# Supplementary material for: Kinetic resolution of 1,1′-binaphthyl-2,2′-diamine derivatives by chiral calcium phosphate-catalyzed acylation
Source: Royal Society of Chemistry journal article supplement (doi:10.1039/d4ob00355a), 2024-01-01

## Kinetic resolution of 1,1'-binaphthyl-2,2'-diamine derivatives by chiral calcium phosphate catalyzed acylation

Tatsuhiko Uchikura,<sup>1</sup> Yuki Kanno,<sup>1</sup> Yukino Fukuda,<sup>1</sup> Mikoto Sato,<sup>1</sup> and Takahiko Akiyama<sup>1\*</sup>

<sup>1</sup>Department of Chemistry, Faculty of Science, Gakushuin University, 1-5-1 Mejiro, Toshima-ku, Tokyo 171-8588, Japan

*E-mail: takahiko.akiyama@gakushuin.ac.jp*

| Contents                                                                        | Page |
|---------------------------------------------------------------------------------|------|
| 1. General Methods                                                              | S2   |
| 2. Experimental section                                                         |      |
| 2-1. General procedure of kinetic resolution of BINAM derivatives (Procedure I) | S3   |
| 2-2. 1 mmol scale experiment                                                    | S12  |
| 2-3. Hydrolysis of ( <i>R</i> )- <b>2a</b>                                      | S13  |
| 3. HPLC data                                                                    | S14  |
| 4. NMR spectra                                                                  | S32  |

## 1. General Methods

All operations were performed under nitrogen unless otherwise noted. For thin-layer chromatography (TLC) analysis, Merck pre-coated plates (silica gel 60 F254, Art 5715, 0.25 mm) were used. Column chromatography and preparative TLC (PTLC) were performed on PSQ 60B, Fuji Silysia Chemical Ltd. and Wakogel B-5F, Wako pure Chemical Industries, respectively. NMR spectra for products data ( $^1\text{H}$  and  $^{13}\text{C}$ ) were recorded on a Bruker AVANCE-III (400 MHz for  $^1\text{H}$ , 100 MHz for  $^{13}\text{C}$ , 376 MHz for  $^{19}\text{F}$ ) and JEOL ECZ-400 (400 MHz for  $^1\text{H}$ , 100 MHz for  $^{13}\text{C}$ , 376 MHz for  $^{19}\text{F}$ ) spectrometer using  $\text{CDCl}_3$  [tetramethylsilane (0 ppm) served as an internal standard in  $^1\text{H}$  NMR and  $\text{CDCl}_3$  (77.0 ppm) in  $^{13}\text{C}$  NMR]. Chemical shifts are expressed in parts per million (ppm). ESI mass analyses were performed on Bruker micrOTOF mass spectrometer. IR spectra were recorded on a FT/IR-4200 (JASCO Co., Ltd.). High performance liquid chromatography (HPLC) was performed on a Chromaster (Hitachi High-Tech Co., Ltd.) with Daicel CHIRALCEL® (Daicel Co., Ltd.).

Solvents were distilled according to the usual procedures and stored over molecular sieves unless otherwise noted. All of the substrates were purified by distillation (for liquid) or recrystallization (for solid). Other chemicals were purchased and used as received.

## 2. Experimental section

### 2-1. General procedure of kinetic resolution of BINAM derivatives (Procedure I)

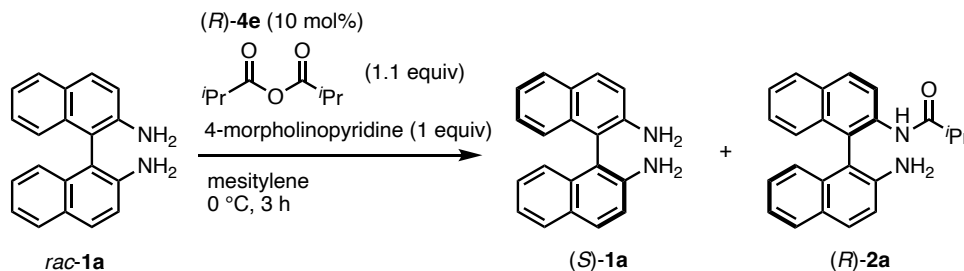

In a dried test tube, **1a** (14.2 mg, 0.05 mmol), 4-morpholinopyridine (4.2 mg, 0.025 mmol), chiral phosphate *(R)*-**4e** (10.1 mg, 0.005 mmol) were mixed in mesitylene (1 mL). The mixture was cooled to 0 °C, and isobutyric anhydride (8.3  $\mu$ L, 0.05 mmol) in mesitylene (1 mL) was added by dropwise to the mixture for 2 minutes at 0 °C. After stirred for 3 h, the reaction mixture was quenched with sat. NaHCO<sub>3</sub> aq. and extracted with EtOAc 3 times. The combined organic layer was dried over Na<sub>2</sub>SO<sub>4</sub>. The solvent was evaporated *in vacuo* by rotary evaporator and resulting mesitylene was removed by smart evaporator C1 (BioChromato Co., Ltd.). The crude mixture was purified by preparative TLC on SiO<sub>2</sub> (toluene: ethyl acetate = 10 : 1) to give *(S)*-**1a** and *(R)*-**2a**. The ee of the products were determined by HPLC analysis.

The reactions in Figure 3 were performed based on the Procedure I.

## Data of products

|                                                                                     |                                                                                                                                                                                                                                                                                                                                                                                                                                                                                                                                                                                 |
|-------------------------------------------------------------------------------------|---------------------------------------------------------------------------------------------------------------------------------------------------------------------------------------------------------------------------------------------------------------------------------------------------------------------------------------------------------------------------------------------------------------------------------------------------------------------------------------------------------------------------------------------------------------------------------|
| <p><b>(S)-1a</b></p>                                                                | <p>White solid.</p>                                                                                                                                                                                                                                                                                                                                                                                                                                                                                                                                                             |
| 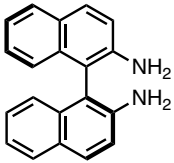   | <p><math>^1\text{H NMR}</math> (400 MHz, <math>\text{CDCl}_3</math>) <math>\delta</math> 7.87 – 7.75 (m, 4H), 7.28 – 7.16 (m, 4H), 7.13 (d, <math>J</math> = 8.7 Hz, 2H), 7.11 – 7.05 (m, 2H), 3.63 (brs, 4H).</p>                                                                                                                                                                                                                                                                                                                                                              |
|                                                                                     | <p><math>^{13}\text{C NMR}</math> (101 MHz, <math>\text{CDCl}_3</math>) <math>\delta</math> 142.7, 133.7, 129.5, 128.4, 128.1, 126.8, 123.9, 122.4, 118.3, 112.5.</p>                                                                                                                                                                                                                                                                                                                                                                                                           |
|                                                                                     | <p><math>[\alpha]_{\text{D}}^{24}</math> –116.3 (c 0.35, <math>\text{CHCl}_3</math>).</p>                                                                                                                                                                                                                                                                                                                                                                                                                                                                                       |
| <p><b>(R)-2a</b></p>                                                                | <p>White solid.</p>                                                                                                                                                                                                                                                                                                                                                                                                                                                                                                                                                             |
|    | <p><math>^1\text{H NMR}</math> (400 MHz, <math>\text{CDCl}_3</math>) <math>\delta</math> 8.64 (d, <math>J</math> = 9.0 Hz, 1H), 8.00 (d, <math>J</math> = 9.1 Hz, 1H), 7.92 (dt, <math>J</math> = 8.4, 1.0 Hz, 1H), 7.86 (dd, <math>J</math> = 8.9, 0.8 Hz, 1H), 7.81 (dd, <math>J</math> = 7.6, 1.5 Hz, 1H), 7.45 – 7.38 (m, 1H), 7.32 – 7.17 (m, 4H), 7.15 (d, <math>J</math> = 8.8 Hz, 1H), 7.08 (brs, 1H), 6.96 – 6.91 (m, 1H), 3.67 (brs, 2H), 2.13 (sept, <math>J</math> = 7.0 Hz, 1H), 0.87 (d, <math>J</math> = 7.0 Hz, 3H), 0.81 (d, <math>J</math> = 7.0 Hz, 3H).</p> |
|                                                                                     | <p><math>^{13}\text{C NMR}</math> (101 MHz, <math>\text{CDCl}_3</math>) <math>\delta</math> 175.3, 142.7, 135.1, 133.5, 132.3, 131.2, 130.3, 129.2, 128.3, 128.2, 128.1, 127.3, 126.8, 125.3, 125.0, 123.6, 122.7, 120.9, 120.5, 118.0, 110.3, 36.4, 19.1, 19.0.</p>                                                                                                                                                                                                                                                                                                            |
|                                                                                     | <p>LRMS (ESI): <math>m/z</math> = 377 [M+Na].</p>                                                                                                                                                                                                                                                                                                                                                                                                                                                                                                                               |
|                                                                                     | <p>HRMS (ESI): Calcd for <math>\text{C}_{24}\text{H}_{22}\text{NaN}_2\text{O}</math>: 377.1630. Found 377.1633.</p>                                                                                                                                                                                                                                                                                                                                                                                                                                                             |
|                                                                                     | <p><math>[\alpha]_{\text{D}}^{24}</math> +52.9 (c 0.41, <math>\text{CHCl}_3</math>).</p>                                                                                                                                                                                                                                                                                                                                                                                                                                                                                        |
|                                                                                     | <p>IR (neat, <math>\text{cm}^{-1}</math>): 3355, 1685, 1619, 1595, 1497, 1277, 817, 748.</p>                                                                                                                                                                                                                                                                                                                                                                                                                                                                                    |
| <p><b>(S)-1b</b></p>                                                                | <p>Ocher solid.</p>                                                                                                                                                                                                                                                                                                                                                                                                                                                                                                                                                             |
|  | <p><math>^1\text{H NMR}</math> (400 MHz, <math>\text{CDCl}_3</math>) <math>\delta</math> 7.93 (d, <math>J</math> = 2.1 Hz, 2H), 7.71 (dd, <math>J</math> = 8.9, 0.8 Hz, 2H), 7.26 (dd, <math>J</math> = 9.0, 2.1 Hz, 2H), 7.15 (d, <math>J</math> = 8.8 Hz, 2H), 6.89 (d, <math>J</math> = 9.0 Hz, 2H), 3.73 (brs, 4H).</p>                                                                                                                                                                                                                                                     |
|                                                                                     | <p><math>^{13}\text{C NMR}</math> (101 MHz, <math>\text{CDCl}_3</math>) <math>\delta</math> 143.0, 132.1, 130.1, 130.1, 129.5, 128.8, 125.6, 119.2, 116.0, 111.8.</p>                                                                                                                                                                                                                                                                                                                                                                                                           |
|                                                                                     | <p>LRMS (ESI): <math>m/z</math> = 463, 465, 467 [M+Na].</p>                                                                                                                                                                                                                                                                                                                                                                                                                                                                                                                     |

|  |                                                                                                                                     |
|--|-------------------------------------------------------------------------------------------------------------------------------------|
|  | HRMS (ESI): Calcd for C <sub>20</sub> H <sub>14</sub> <sup>79</sup> Br <sup>81</sup> BrN <sub>2</sub> Na: 464.9421. Found 464.9423. |
|  | [α] <sub>D</sub> <sup>24</sup> –13.0 (c 0.47, CHCl <sub>3</sub> ).                                                                  |
|  | IR (neat, cm <sup>-1</sup> ): 3370, 1616, 1495, 1384, 1351, 812.                                                                    |

|                                                                                   |                                                                                                                                                                                                                                                                                                                                                                                                                                                                                                                    |
|-----------------------------------------------------------------------------------|--------------------------------------------------------------------------------------------------------------------------------------------------------------------------------------------------------------------------------------------------------------------------------------------------------------------------------------------------------------------------------------------------------------------------------------------------------------------------------------------------------------------|
| <b>(R)-2b</b>                                                                     | Ocher solid.                                                                                                                                                                                                                                                                                                                                                                                                                                                                                                       |
| 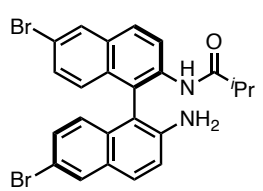 | <sup>1</sup> H NMR (400 MHz, CDCl <sub>3</sub> ) δ 8.66 (d, <i>J</i> = 9.1 Hz, 1H), 8.07 (d, <i>J</i> = 2.0 Hz, 1H), 7.96 (d, <i>J</i> = 2.1 Hz, 1H), 7.91 (d, <i>J</i> = 9.0 Hz, 1H), 7.77 (d, <i>J</i> = 8.8 Hz, 1H), 7.34 (dd, <i>J</i> = 9.0, 2.0 Hz, 1H), 7.26 (dd, <i>J</i> = 9.0, 2.1 Hz, 1H), 7.16 (d, <i>J</i> = 8.8 Hz, 1H), 7.07 – 6.99 (m, 2H), 6.74 (d, <i>J</i> = 8.9 Hz, 1H), 3.71 (brs, 2H), 2.16 (sept, <i>J</i> = 6.9 Hz, 1H), 0.90 (d, <i>J</i> = 7.0 Hz, 3H), 0.86 (d, <i>J</i> = 6.9 Hz, 3H). |
|                                                                                   | <sup>13</sup> C NMR (101 MHz, CDCl <sub>3</sub> ) δ 175.4, 143.1, 135.5, 132.2, 132.0, 130.8, 130.6, 130.28 (2C), 130.25, 129.6, 129.2, 128.5, 127.0, 125.2, 122.1, 120.1, 119.2, 118.9, 116.4, 109.6, 36.4, 19.1, 19.0.                                                                                                                                                                                                                                                                                           |
|                                                                                   | LRMS (ESI): <i>m/z</i> = 533, 535, 537 [M+Na].                                                                                                                                                                                                                                                                                                                                                                                                                                                                     |
|                                                                                   | HRMS (ESI): Calcd for C <sub>24</sub> H <sub>20</sub> <sup>79</sup> Br <sub>2</sub> N <sub>2</sub> NaO: 532.9840. Found 532.9836.                                                                                                                                                                                                                                                                                                                                                                                  |
|                                                                                   | [α] <sub>D</sub> <sup>24</sup> –40.5 (c 0.6, CHCl <sub>3</sub> ).                                                                                                                                                                                                                                                                                                                                                                                                                                                  |
|                                                                                   | IR (neat, cm <sup>-1</sup> ): 3356, 1684, 1619, 1588, 1488, 1388, 813, 755.                                                                                                                                                                                                                                                                                                                                                                                                                                        |

|                                                                                     |                                                                                                                                                                                                                                                                                                     |
|-------------------------------------------------------------------------------------|-----------------------------------------------------------------------------------------------------------------------------------------------------------------------------------------------------------------------------------------------------------------------------------------------------|
| <b>(S)-1c</b>                                                                       | White solid.                                                                                                                                                                                                                                                                                        |
| 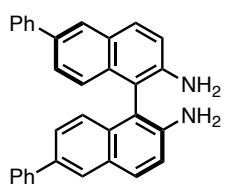 | <sup>1</sup> H NMR (400 MHz, CDCl <sub>3</sub> ) δ 8.02 (d, <i>J</i> = 1.6 Hz, 2H), 7.88 (d, <i>J</i> = 8.8 Hz, 2H), 7.66 (d, <i>J</i> = 9.3 Hz, 2H), 7.50 (dd, <i>J</i> = 8.7, 1.9 Hz, 2H), 7.44 (t, <i>J</i> = 7.7 Hz, 4H), 7.32 (t, <i>J</i> = 7.4 Hz, 2H), 7.22 – 7.15 (m, 4H), 3.77 (brs, 4H). |
|                                                                                     | <sup>13</sup> C NMR (101 MHz, CDCl <sub>3</sub> ) δ 142.9, 141.2, 135.2, 132.9, 129.9, 128.74, 128.68, 127.1, 126.8, 126.5, 126.2, 124.5, 118.8, 112.3.                                                                                                                                             |
|                                                                                     | LRMS (ESI): <i>m/z</i> = 459 [M+Na].                                                                                                                                                                                                                                                                |
|                                                                                     | HRMS (ESI): Calcd for C <sub>32</sub> H <sub>24</sub> N <sub>2</sub> Na: 459.1837. Found 459.1839.                                                                                                                                                                                                  |
|                                                                                     | [α] <sub>D</sub> <sup>24</sup> +50.8 (c 0.53, CHCl <sub>3</sub> ).                                                                                                                                                                                                                                  |
|                                                                                     | IR (neat, cm <sup>-1</sup> ): 3377, 1619, 1492, 1385, 759.                                                                                                                                                                                                                                          |

|                                                                                   |                                                                                                                                                                                                                                                                                                                                                                                                                                                                                   |
|-----------------------------------------------------------------------------------|-----------------------------------------------------------------------------------------------------------------------------------------------------------------------------------------------------------------------------------------------------------------------------------------------------------------------------------------------------------------------------------------------------------------------------------------------------------------------------------|
| <b>(R)-2c</b>                                                                     | White solid.                                                                                                                                                                                                                                                                                                                                                                                                                                                                      |
| 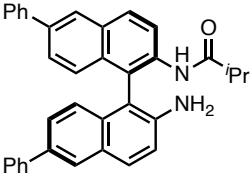 | $^1\text{H NMR}$ (400 MHz, $\text{CDCl}_3$ ) $\delta$ 8.69 (d, $J$ = 9.0 Hz, 1H), 8.13 (d, $J$ = 1.9 Hz, 1H), 8.07 (d, $J$ = 9.0 Hz, 1H), 8.04 (d, $J$ = 1.9 Hz, 1H), 7.93 (d, $J$ = 8.7 Hz, 1H), 7.71 – 7.63 (m, 4H), 7.57 (dd, $J$ = 8.8, 1.9 Hz, 1H), 7.52 – 7.42 (m, 5H), 7.39 – 7.30 (m, 3H), 7.19 (d, $J$ = 8.8 Hz, 1H), 7.15 (brs, 1H), 7.05 (d, $J$ = 8.8 Hz, 1H), 3.73 (brs, 2H), 2.17 (sept, $J$ = 6.9 Hz, 1H), 0.91 (d, $J$ = 7.0 Hz, 3H), 0.86 (d, $J$ = 6.9 Hz, 3H). |
|                                                                                   | $^{13}\text{C NMR}$ (101 MHz, $\text{CDCl}_3$ ) $\delta$ 175.4, 142.9, 140.9, 140.8, 137.8, 135.4, 135.2, 132.8, 131.5, 131.5, 130.7, 129.6, 128.84, 128.81, 128.4, 127.31, 127.25, 127.0, 126.9, 126.5, 126.2, 125.9, 124.2, 121.4, 120.3, 118.4, 110.1, 36.5, 19.1, 19.0.                                                                                                                                                                                                       |
|                                                                                   | LRMS (ESI): $m/z$ = 529 [M+Na].                                                                                                                                                                                                                                                                                                                                                                                                                                                   |
|                                                                                   | HRMS (ESI): Calcd for $\text{C}_{36}\text{H}_{30}\text{N}_2\text{NaO}$ : 529.2256. Found 529.2253.                                                                                                                                                                                                                                                                                                                                                                                |
|                                                                                   | $[\alpha]_{\text{D}}^{24}$ –98.3 (c 0.6, $\text{CHCl}_3$ ).                                                                                                                                                                                                                                                                                                                                                                                                                       |
| IR (neat, $\text{cm}^{-1}$ ): 1684, 1599, 1489, 757, 697.                         |                                                                                                                                                                                                                                                                                                                                                                                                                                                                                   |

|                                                                                     |                                                                                                                                                                                                                                                            |
|-------------------------------------------------------------------------------------|------------------------------------------------------------------------------------------------------------------------------------------------------------------------------------------------------------------------------------------------------------|
| <b>(S)-1d</b>                                                                       | White solid.                                                                                                                                                                                                                                               |
| 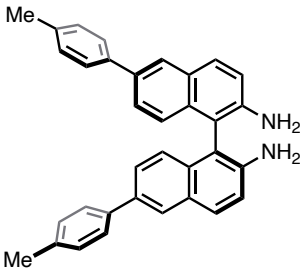 | $^1\text{H NMR}$ (400 MHz, $\text{CDCl}_3$ ) $\delta$ 7.99 (d, $J$ = 1.9 Hz, 2H), 7.87 (d, $J$ = 8.7 Hz, 2H), 7.56 (d, $J$ = 8.2 Hz, 4H), 7.48 (dd, $J$ = 8.8, 1.9 Hz, 2H), 7.29 – 7.22 (m, 4H), 7.18 (d, $J$ = 8.8 Hz, 4H), 3.76 (brs, 4H), 2.39 (s, 6H). |
|                                                                                     | $^{13}\text{C NMR}$ (101 MHz, $\text{CDCl}_3$ ) $\delta$ 142.7, 138.4, 136.6, 135.1, 132.8, 129.8, 129.5, 128.7, 126.9, 126.4, 125.8, 124.4, 118.7, 112.4, 21.1.                                                                                           |
|                                                                                     | LRMS (ESI): $m/z$ = 487 [M+Na].                                                                                                                                                                                                                            |
|                                                                                     | HRMS (ESI): Calcd for $\text{C}_{34}\text{H}_{28}\text{N}_2\text{Na}$ : 487.2150. Found 487.2148.                                                                                                                                                          |
|                                                                                     | $[\alpha]_{\text{D}}^{24}$ +116.8 (c 0.53, $\text{CHCl}_3$ ).                                                                                                                                                                                              |
| IR (neat, $\text{cm}^{-1}$ ): 3374, 1620, 1496, 1385, 1360, 814, 755.               |                                                                                                                                                                                                                                                            |

|               |                                                                                                                                                                                                            |
|---------------|------------------------------------------------------------------------------------------------------------------------------------------------------------------------------------------------------------|
| <b>(R)-2d</b> | White solid.                                                                                                                                                                                               |
|               | $^1\text{H NMR}$ (400 MHz, $\text{CDCl}_3$ ) $\delta$ 8.67 (d, $J$ = 9.0 Hz, 1H), 8.10 (d, $J$ = 1.9 Hz, 1H), 8.05 (d, $J$ = 9.0 Hz, 1H), 8.01 (d, $J$ = 1.9 Hz, 1H), 7.95 – 7.87 (m, 1H), 7.63 – 7.52 (m, |

|  |                                                                                                                                                                                                                                                                                                                                                                                                                                                                              |
|--|------------------------------------------------------------------------------------------------------------------------------------------------------------------------------------------------------------------------------------------------------------------------------------------------------------------------------------------------------------------------------------------------------------------------------------------------------------------------------|
|  | <p><math>^1\text{H}</math> NMR (400 MHz, <math>\text{CDCl}_3</math>) <math>\delta</math> 5H), 7.48 (dd, <math>J = 8.8, 1.9</math> Hz, 1H), 7.33 (d, <math>J = 8.8</math> Hz, 1H), 7.29 – 7.23 (m, 4H), 7.17 (d, <math>J = 8.8</math> Hz, 1H), 7.14 (brs, 1H), 7.03 (d, <math>J = 8.7</math> Hz, 1H), 3.73 (brs, 2H), 2.40 (s, 3H), 2.39 (s, 3H), 2.16 (sept, <math>J = 6.9</math> Hz, 1H), 0.90 (d, <math>J = 6.9</math> Hz, 3H), 0.85 (d, <math>J = 6.9</math> Hz, 3H).</p> |
|  | <p><math>^{13}\text{C}</math> NMR (101 MHz, <math>\text{CDCl}_3</math>) <math>\delta</math> 175.4, 142.7, 138.0, 137.9, 137.7, 137.1, 136.8, 135.4, 135.0, 132.6, 131.5, 131.4, 130.6, 129.6, 129.54, 129.47, 128.4, 127.1, 126.8, 126.5, 125.9, 125.8, 124.1, 121.3, 120.4, 118.4, 110.2, 36.5, 21.11, 21.09, 19.1, 19.0.</p>                                                                                                                                               |
|  | <p>LRMS (ESI): <math>m/z = 557</math> [<math>\text{M} + \text{Na}</math>].</p>                                                                                                                                                                                                                                                                                                                                                                                               |
|  | <p>HRMS (ESI): Calcd for <math>\text{C}_{38}\text{H}_{34}\text{N}_2\text{NaO}</math>: 557.2569. Found 557.2566.</p>                                                                                                                                                                                                                                                                                                                                                          |
|  | <p><math>[\alpha]_{\text{D}}^{24} -191.8</math> (c 0.63, <math>\text{CHCl}_3</math>).</p>                                                                                                                                                                                                                                                                                                                                                                                    |
|  | <p>IR (neat, <math>\text{cm}^{-1}</math>): 3387, 1684, 1598, 1488, 814, 756.</p>                                                                                                                                                                                                                                                                                                                                                                                             |

|                      |                                                                                                                                                                                                                                                                                                                          |
|----------------------|--------------------------------------------------------------------------------------------------------------------------------------------------------------------------------------------------------------------------------------------------------------------------------------------------------------------------|
| <p><b>(S)-1e</b></p> | <p>Ocher solid.</p>                                                                                                                                                                                                                                                                                                      |
|                      | <p><math>^1\text{H}</math> NMR (400 MHz, <math>\text{CDCl}_3</math>) <math>\delta</math> 7.96 (d, <math>J = 2.0</math> Hz, 2H), 7.90 – 7.85 (m, 2H), 7.64 – 7.58 (m, 4H), 7.43 (dd, <math>J = 8.7, 2.0</math> Hz, 2H), 7.19 (t, <math>J = 8.4</math> Hz, 4H), 7.12 (t, <math>J = 8.7</math> Hz, 4H), 3.78 (brs, 4H).</p> |
|                      | <p><math>^{13}\text{C}</math> NMR (101 MHz, <math>\text{CDCl}_3</math>) <math>\delta</math> 162.2 (d, <math>J = 245.8</math> Hz), 142.9, 137.3 (d, <math>J = 3.3</math> Hz), 134.2, 132.8, 129.9, 128.6, 128.5 (d, <math>J = 8.0</math> Hz), 126.2 (d, <math>J = 27.6</math> Hz), 124.5, 118.9, 115.7, 115.5, 112.2.</p> |
|                      | <p>LRMS (ESI): <math>m/z = 495</math> [<math>\text{M} + \text{Na}</math>].</p>                                                                                                                                                                                                                                           |
|                      | <p>HRMS (ESI): Calcd for <math>\text{C}_{32}\text{H}_{22}\text{F}_2\text{N}_2\text{Na}</math>: 495.1649. Found 495.1651.</p>                                                                                                                                                                                             |
|                      | <p><math>[\alpha]_{\text{D}}^{24} +54.8</math> (c 0.46, <math>\text{CHCl}_3</math>).</p>                                                                                                                                                                                                                                 |
|                      | <p>IR (neat, <math>\text{cm}^{-1}</math>): 3370, 1620, 1497, 1386, 1223, 1157, 822, 754.</p>                                                                                                                                                                                                                             |

|                      |                                                                                                                                                                                                                                                                                                                                                                                                                                                                                                                                                  |
|----------------------|--------------------------------------------------------------------------------------------------------------------------------------------------------------------------------------------------------------------------------------------------------------------------------------------------------------------------------------------------------------------------------------------------------------------------------------------------------------------------------------------------------------------------------------------------|
| <p><b>(R)-2e</b></p> | <p>Ocher solid.</p>                                                                                                                                                                                                                                                                                                                                                                                                                                                                                                                              |
|                      | <p><math>^1\text{H}</math> NMR (400 MHz, <math>\text{CDCl}_3</math>) <math>\delta</math> 8.69 (d, <math>J = 9.0</math> Hz, 1H), 8.09 – 8.04 (m, 2H), 7.98 (d, <math>J = 2.0</math> Hz, 1H), 7.92 (dd, <math>J = 8.9, 0.7</math> Hz, 1H), 7.68 – 7.57 (m, 4H), 7.50 (dd, <math>J = 8.8, 1.9</math> Hz, 1H), 7.43 (dd, <math>J = 8.7, 2.0</math> Hz, 1H), 7.32 (d, <math>J = 8.7</math> Hz, 1H), 7.20 (d, <math>J = 8.7</math> Hz, 1H), 7.18 – 7.10 (m, 5H), 7.03 (d, <math>J = 8.7</math> Hz, 1H), 3.74 (brs, 2H), 2.17 (sept, <math>J</math></p> |

|                                                                        |                                                                                                                                                                                                                                                                                                                                                                                                                                 |
|------------------------------------------------------------------------|---------------------------------------------------------------------------------------------------------------------------------------------------------------------------------------------------------------------------------------------------------------------------------------------------------------------------------------------------------------------------------------------------------------------------------|
|                                                                        | = 6.9 Hz, 1H), 0.91 (d, $J = 7.0$ Hz, 3H), 0.86 (d, $J = 6.9$ Hz, 3H).                                                                                                                                                                                                                                                                                                                                                          |
|                                                                        | $^{13}\text{C}$ NMR (101 MHz, $\text{CDCl}_3$ ) $\delta$ 175.4, 162.5 (d, $J = 246.6$ Hz), 162.3 (d, $J = 246.2$ Hz), 142.9, 137.0 (d, $J = 3.2$ Hz), 136.9 (d, $J = 3.3$ Hz), 136.8, 135.3, 134.5, 132.7, 131.48, 131.45, 130.7, 129.5, 128.8 (d, $J = 8.1$ Hz), 128.5 (d, $J = 8.0$ Hz), 128.4, 126.8, 126.4, 126.0, 124.3, 121.5, 120.3, 118.5, 115.8 (d, $J = 21.4$ Hz), 115.7 (d, $J = 21.4$ Hz), 110.1, 36.5, 19.2, 19.0. |
|                                                                        | LRMS (ESI): $m/z = 565$ [M+Na].                                                                                                                                                                                                                                                                                                                                                                                                 |
|                                                                        | HRMS (ESI): Calcd for $\text{C}_{36}\text{H}_{28}\text{F}_2\text{N}_2\text{NaO}$ : 565.2067. Found 565.2071.                                                                                                                                                                                                                                                                                                                    |
|                                                                        | $[\alpha]_{\text{D}}^{24} -101.5$ (c 0.45, $\text{CHCl}_3$ ).                                                                                                                                                                                                                                                                                                                                                                   |
| IR (neat, $\text{cm}^{-1}$ ): 3392, 1683, 1604, 1518, 1289, 1226, 822. |                                                                                                                                                                                                                                                                                                                                                                                                                                 |

|                                                                  |                                                                                                                                                                                                                                                     |
|------------------------------------------------------------------|-----------------------------------------------------------------------------------------------------------------------------------------------------------------------------------------------------------------------------------------------------|
| <b>(S)-1f</b>                                                    | Ocher solid.                                                                                                                                                                                                                                        |
|                                                                  | $^1\text{H}$ NMR (400 MHz, $\text{CDCl}_3$ ) $\delta$ 7.96 (d, $J = 2.0$ Hz, 2H), 7.89 – 7.83 (m, 2H), 7.59 (d, $J = 8.8$ Hz, 4H), 7.46 (dd, $J = 8.7, 2.0$ Hz, 2H), 7.22 – 7.15 (m, 4H), 6.99 (d, $J = 8.8$ Hz, 4H), 3.85 (s, 6H), 3.75 (brs, 4H). |
|                                                                  | $^{13}\text{C}$ NMR (101 MHz, $\text{CDCl}_3$ ) $\delta$ 158.8, 142.6, 134.8, 133.8, 132.6, 129.7, 128.8, 128.1, 126.3, 125.5, 124.5, 118.7, 114.2, 112.4, 55.3.                                                                                    |
|                                                                  | LRMS (ESI): $m/z = 519$ [M+Na].                                                                                                                                                                                                                     |
|                                                                  | HRMS (ESI): Calcd for $\text{C}_{34}\text{H}_{28}\text{N}_2\text{NaO}$ : 519.2048. Found 519.2046.                                                                                                                                                  |
|                                                                  | $[\alpha]_{\text{D}}^{24} -44.1$ (c 0.32, $\text{CHCl}_3$ ).                                                                                                                                                                                        |
| IR (neat, $\text{cm}^{-1}$ ): 1608, 1519, 1245, 1180, 1040, 821. |                                                                                                                                                                                                                                                     |

|               |                                                                                                                                                                                                                                                                                                                                                                                                                                                                                                                          |
|---------------|--------------------------------------------------------------------------------------------------------------------------------------------------------------------------------------------------------------------------------------------------------------------------------------------------------------------------------------------------------------------------------------------------------------------------------------------------------------------------------------------------------------------------|
| <b>(R)-2f</b> | Ocher solid.                                                                                                                                                                                                                                                                                                                                                                                                                                                                                                             |
|               | $^1\text{H}$ NMR (400 MHz, $\text{CDCl}_3$ ) $\delta$ 8.67 (d, $J = 9.0$ Hz, 1H), 8.07 (d, $J = 1.9$ Hz, 1H), 8.05 (d, $J = 9.1$ Hz, 1H), 7.98 (d, $J = 1.9$ Hz, 1H), 7.91 (d, $J = 8.8$ Hz, 1H), 7.65 – 7.57 (m, 4H), 7.53 (dd, $J = 8.8, 1.9$ Hz, 1H), 7.46 (dd, $J = 8.8, 2.0$ Hz, 1H), 7.32 (d, $J = 8.7$ Hz, 1H), 7.18 (d, $J = 8.8$ Hz, 1H), 7.14 (s, 1H), 7.05 – 6.96 (m, 5H), 3.86 (s, 3H), 3.85 (s, 3H), 3.72 (brs, 2H), 2.17 (sept, $J = 6.9$ Hz, 1H), 0.91 (d, $J = 6.9$ Hz, 3H), 0.86 (d, $J = 6.9$ Hz, 3H). |



|  |                                                                                                                                                                                                                                                                                               |
|--|-----------------------------------------------------------------------------------------------------------------------------------------------------------------------------------------------------------------------------------------------------------------------------------------------|
|  | <sup>13</sup> C NMR (101 MHz, CDCl <sub>3</sub> ) δ 175.4, 159.2, 159.0, 142.7, 137.4, 135.1, 134.9, 133.5, 133.4, 132.5, 131.6, 131.2, 130.6, 129.4, 128.5, 128.3, 128.1, 126.8, 126.4, 125.9, 125.5, 125.4, 124.2, 121.4, 120.4, 118.4, 114.35, 114.31, 110.3, 55.4 (2C), 36.5, 19.2, 19.0. |
|  | LRMS (ESI): <i>m/z</i> = 589 [M+Na].                                                                                                                                                                                                                                                          |
|  | HRMS (ESI): Calcd for C <sub>38</sub> H <sub>34</sub> N <sub>2</sub> NaO <sub>3</sub> : 589.2467. Found 589.2471.                                                                                                                                                                             |
|  | [α] <sub>D</sub> <sup>24</sup> -106.3 (c 0.27, CHCl <sub>3</sub> ).                                                                                                                                                                                                                           |
|  | IR (neat, cm <sup>-1</sup> ): 1684, 1608, 1519, 1488, 1283, 1247, 821.                                                                                                                                                                                                                        |

|               |                                                                                                                                                                                                                                                                                        |
|---------------|----------------------------------------------------------------------------------------------------------------------------------------------------------------------------------------------------------------------------------------------------------------------------------------|
| <b>(S)-1g</b> | White solid.                                                                                                                                                                                                                                                                           |
|               | <sup>1</sup> H NMR (400 MHz, CDCl <sub>3</sub> ) δ 8.16 (d, <i>J</i> = 1.9 Hz, 2H), 8.10 (d, <i>J</i> = 1.8 Hz, 2H), 7.95 – 7.81 (m, 10H), 7.64 (dd, <i>J</i> = 8.7, 2.0 Hz, 2H), 7.52 – 7.43 (m, 4H), 7.26 (d, <i>J</i> = 8.9 Hz, 2H), 7.21 (d, <i>J</i> = 8.8 Hz, 2H), 3.80 (s, 4H). |
|               | <sup>13</sup> C NMR (101 MHz, CDCl <sub>3</sub> ) δ 143.0, 138.5, 135.0, 133.8, 133.0, 132.4, 130.0, 128.8, 128.4, 128.1, 127.6, 126.6, 126.5, 126.2, 125.7, 125.6, 125.5, 124.6, 118.8, 112.3.                                                                                        |
|               | LRMS (ESI): <i>m/z</i> = 559 [M+Na].                                                                                                                                                                                                                                                   |
|               | HRMS (ESI): Calcd for C <sub>40</sub> H <sub>28</sub> N <sub>2</sub> Na: 559.2150. Found 559.2147.                                                                                                                                                                                     |
|               | [α] <sub>D</sub> <sup>24</sup> +209.7 (c 0.56, CHCl <sub>3</sub> ).                                                                                                                                                                                                                    |
|               | IR (neat, cm <sup>-1</sup> ): 3376, 1618, 1483, 1385, 817, 748.                                                                                                                                                                                                                        |

|                                                                                     |                                                                                                                                                                                                                                                                                                                                                                                                                                                                                                                                         |
|-------------------------------------------------------------------------------------|-----------------------------------------------------------------------------------------------------------------------------------------------------------------------------------------------------------------------------------------------------------------------------------------------------------------------------------------------------------------------------------------------------------------------------------------------------------------------------------------------------------------------------------------|
| <b>(S)-2g</b>                                                                       | White solid.                                                                                                                                                                                                                                                                                                                                                                                                                                                                                                                            |
| 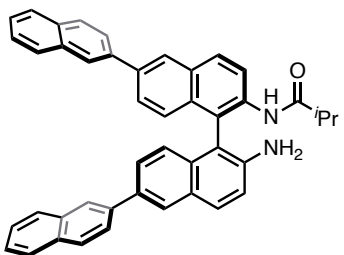 | <sup>1</sup> H NMR (400 MHz, CDCl <sub>3</sub> ) δ 8.73 (d, <i>J</i> = 9.0 Hz, 1H), 8.27 (d, <i>J</i> = 1.9 Hz, 1H), 8.18 (d, <i>J</i> = 1.9 Hz, 1H), 8.15 – 8.09 (m, 3H), 8.01 – 7.81 (m, 9H), 7.71 (dd, <i>J</i> = 8.8, 1.9 Hz, 1H), 7.64 (dd, <i>J</i> = 8.8, 2.0 Hz, 1H), 7.55 – 7.44 (m, 4H), 7.40 (d, <i>J</i> = 8.7 Hz, 1H), 7.22 (d, <i>J</i> = 8.8 Hz, 1H), 7.19 (s, 1H), 7.11 (d, <i>J</i> = 8.7 Hz, 1H), 3.79 (s, 2H), 2.19 (sept, <i>J</i> = 6.9 Hz, 1H), 0.93 (d, <i>J</i> = 6.9 Hz, 3H), 0.89 (d, <i>J</i> = 6.9 Hz, 3H). |
|                                                                                     | <sup>13</sup> C NMR (101 MHz, CDCl <sub>3</sub> ) δ 175.4, 143.0, 138.2, 138.1, 137.7, 135.3, 133.74,                                                                                                                                                                                                                                                                                                                                                                                                                                   |

|  |                                                                                                                                                                                                                                                       |
|--|-------------------------------------------------------------------------------------------------------------------------------------------------------------------------------------------------------------------------------------------------------|
|  | 133.70, 132.9, 132.6, 132.5, 131.63, 131.55, 130.8, 129.6, 128.54, 128.47, 128.2, 128.1, 127.7, 127.6, 127.1, 126.7, 126.5, 126.34, 126.30, 126.1, 125.99, 125.96, 125.8, 125.6, 125.54, 125.47, 124.3, 121.5, 120.4, 118.5, 110.2, 36.5, 19.2, 19.0. |
|  | LRMS (ESI): $m/z = 629$ [M+Na].                                                                                                                                                                                                                       |
|  | HRMS (ESI): Calcd for C <sub>44</sub> H <sub>34</sub> N <sub>2</sub> NaO: 629.2569. Found 629.2571.                                                                                                                                                   |
|  | $[\alpha]_D^{24} -207.9$ (c 0.57, CHCl <sub>3</sub> ).                                                                                                                                                                                                |
|  | IR (neat, cm <sup>-1</sup> ): 1685, 1619, 1594, 1507, 1486, 818, 747.                                                                                                                                                                                 |

|                                                                                    |                                                                                                                                                                                                                                                               |
|------------------------------------------------------------------------------------|---------------------------------------------------------------------------------------------------------------------------------------------------------------------------------------------------------------------------------------------------------------|
| <b>(S)-1h</b>                                                                      | White solid.                                                                                                                                                                                                                                                  |
| 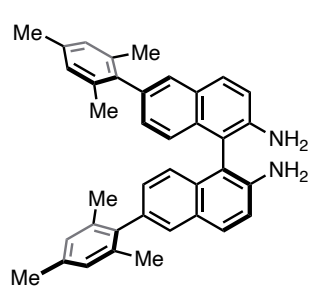 | <sup>1</sup> H NMR (400 MHz, CDCl <sub>3</sub> ) δ 7.79 (d, $J = 8.8$ Hz, 2H), 7.55 (d, $J = 1.7$ Hz, 2H), 7.23 (d, $J = 8.5$ Hz, 2H), 7.18 (d, $J = 8.7$ Hz, 2H), 7.06 (dd, $J = 8.5, 1.7$ Hz, 2H), 6.95 (s, 4H), 3.77 (s, 4H), 2.34 (s, 6H), 2.05 (s, 12H). |
|                                                                                    | <sup>13</sup> C NMR (101 MHz, CDCl <sub>3</sub> ) <sup>13</sup> C NMR (101 MHz, Chloroform- <i>d</i> ) δ 142.5, 139.0, 136.5, 136.42, 136.37, 135.0, 132.4, 129.4, 128.9, 128.6, 128.2, 128.04, 128.00, 123.9, 118.4, 112.8, 21.01, 20.99, 20.96.             |
|                                                                                    | LRMS (ESI): $m/z = 543$ [M+Na].                                                                                                                                                                                                                               |
|                                                                                    | HRMS (ESI): Calcd for C <sub>38</sub> H <sub>36</sub> N <sub>2</sub> Na: 543.2776. Found 543.2775.                                                                                                                                                            |
|                                                                                    | $[\alpha]_D^{24} -37.4$ (c 0.6, CHCl <sub>3</sub> ).                                                                                                                                                                                                          |
|                                                                                    | IR (neat, cm <sup>-1</sup> ): 3376, 1611, 1488, 1381, 754.                                                                                                                                                                                                    |

|                                                                                     |                                                                                                                                                                                                                                                                                                                                                                                                                                                        |
|-------------------------------------------------------------------------------------|--------------------------------------------------------------------------------------------------------------------------------------------------------------------------------------------------------------------------------------------------------------------------------------------------------------------------------------------------------------------------------------------------------------------------------------------------------|
| <b>(R)-2h</b>                                                                       | White solid.                                                                                                                                                                                                                                                                                                                                                                                                                                           |
| 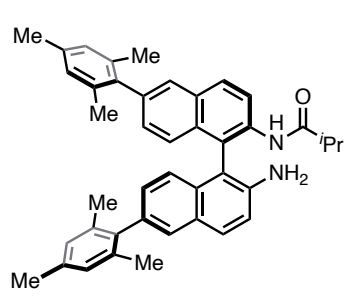 | <sup>1</sup> H NMR (400 MHz, CDCl <sub>3</sub> ) δ 8.67 (d, $J = 9.0$ Hz, 1H), 7.98 (d, $J = 9.0$ Hz, 1H), 7.84 (d, $J = 8.8$ Hz, 1H), 7.68 (d, $J = 1.7$ Hz, 1H), 7.58 (d, $J = 1.6$ Hz, 1H), 7.45 (d, $J = 8.6$ Hz, 1H), 7.22 – 7.03 (m, 5H), 6.97 (s, 2H), 6.96 (s, 2H), 3.73 (s, 2H), 2.34 (s, 3H), 2.34 (s, 3H), 2.15 (sept, $J = 6.9$ Hz, 1H), 2.05 (s, 6H), 2.04 (s, 3H), 1.98 (s, 3H), 0.87 (d, $J = 6.9$ Hz, 3H), 0.76 (d, $J = 7.0$ Hz, 3H). |
|                                                                                     | <sup>13</sup> C NMR (101 MHz, CDCl <sub>3</sub> ) δ 175.1, 142.7, 138.8, 138.6, 137.8, 136.7, 136.6, 136.32, 136.27, 136.14, 136.13, 135.4, 134.9, 132.1, 131.3, 130.9, 130.3, 129.4, 129.1,                                                                                                                                                                                                                                                           |

|  |                                                                                                                                                       |
|--|-------------------------------------------------------------------------------------------------------------------------------------------------------|
|  | 129.0, 128.34, 128.30, 128.13, 128.11, 128.08, 128.0, 125.3, 123.6, 121.0, 120.5, 118.2, 110.5, 36.5, 21.0 (2C), 20.94 (2C), 20.92, 20.7, 19.2, 18.8. |
|  | LRMS (ESI): $m/z = 613$ [M+Na].                                                                                                                       |
|  | HRMS (ESI): Calcd for $C_{42}H_{42}N_2NaO$ : 613.3195. Found 613.3193.                                                                                |
|  | $[\alpha]_D^{24} -17.3$ (c 0.59, $CHCl_3$ ).                                                                                                          |
|  | IR (neat, $cm^{-1}$ ): 3392, 1685, 1596, 1487, 1280, 755.                                                                                             |

|                                                                                   |                                                                                                                                                                                                                                                                                                                                                                |
|-----------------------------------------------------------------------------------|----------------------------------------------------------------------------------------------------------------------------------------------------------------------------------------------------------------------------------------------------------------------------------------------------------------------------------------------------------------|
| ( <i>R</i> )- <b>2i</b>                                                           | White solid.                                                                                                                                                                                                                                                                                                                                                   |
| 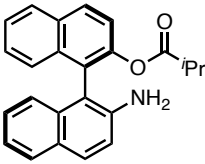 | $^1H$ NMR (400 MHz, $CDCl_3$ ) $\delta$ 8.02 (d, $J = 8.9$ Hz, 1H), 7.96 (d, $J = 8.2$ Hz, 1H), 7.80 – 7.72 (m, 2H), 7.49 (ddd, $J = 8.2, 6.5, 1.5$ Hz, 1H), 7.42 – 7.33 (m, 3H), 7.24 – 7.16 (m, 3H), 7.07 (d, $J = 8.8$ Hz, 1H), 7.02 – 6.96 (m, 1H), 3.62 (brs, 2H), 2.35 (sept, $J = 6.9$ Hz, 1H), 0.72 (d, $J = 7.0$ Hz, 3H), 0.61 (d, $J = 7.0$ Hz, 3H). |
|                                                                                   | $^{13}C$ NMR (101 MHz, $CDCl_3$ ) $\delta$ 175.8, 147.4, 142.6, 133.9, 133.1, 132.2, 129.7, 129.4, 128.3, 127.9, 127.8, 127.0, 126.5, 125.92, 125.88, 125.5, 124.0, 122.2, 122.1, 118.2, 111.9, 33.8, 18.3, 18.1.                                                                                                                                              |
|                                                                                   | LRMS (ESI): $m/z = 378$ [M+Na].                                                                                                                                                                                                                                                                                                                                |
|                                                                                   | HRMS (ESI): Calcd for $C_{24}H_{21}NNaO_2$ : 378.1470. Found 378.1472.                                                                                                                                                                                                                                                                                         |
|                                                                                   | IR (neat, $cm^{-1}$ ): 1749, 1623, 1507, 1215, 1137, 810, 749.                                                                                                                                                                                                                                                                                                 |

## 2-2. 1 mmol scale experiment

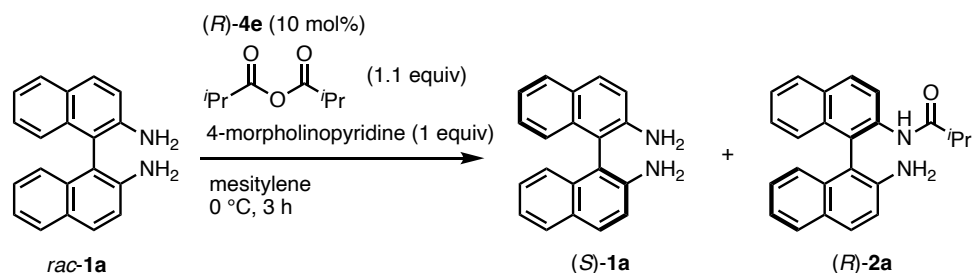

In a dried test tube, **1a** (284.4 mg, 1 mmol), 4-morpholinopyridine (85.1 mg, 1 mmol), chiral phosphate *(R)*-**4e** (202.4 mg, 0.1 mmol) were mixed in mesitylene (20 mL). The mixture was cooled to 0 °C, and isobutyric anhydride (166  $\mu$ L, 1.1 mmol) in mesitylene (20 mL) was added to the mixture by dropwise for 2 minutes at 0 °C. After stirred for 3 h, the reaction mixture was quenched with sat. NaHCO<sub>3</sub> aq. and extracted with EtOAc 3 times. The combined organic layer was dried over Na<sub>2</sub>SO<sub>4</sub>. The solvent was evaporated *in vacuo* by rotary evaporator and resulting mesitylene was removed by smart evaporator C1 (BioChromato Co., Ltd.). The crude mixture was purified by preparative TLC on SiO<sub>2</sub> (toluene: ethyl acetate = 10 : 1) to give *(S)*-**1a** and *(R)*-**2a**. The ee of the products were determined by HPLC analysis.

### 2-3. Hydrolysis of (*R*)-2a

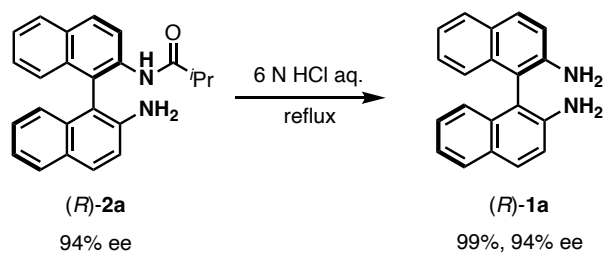

In a test tube, (*R*)-2a (17.7 mg, 0.05 mmol) was treated with 6 M HCl aq. (2 mL). After the mixture was refluxed stirred for 30 min, NaOH aq. was added and the alkaline solution was extracted with ethyl acetate for 3 times. The combined organic phase was dried over Na<sub>2</sub>SO<sub>4</sub> and the solvent was removed *in vacuo* by rotary evaporator. The crude mixture was purified by preparative TLC on SiO<sub>2</sub> (toluene: ethyl acetate = 10 : 1) to give the deprotected product (*R*)-1a (14.1 mg, 0.0495 mmol) in 99% with 94% ee.

### 3. HPLC data

#### 1a

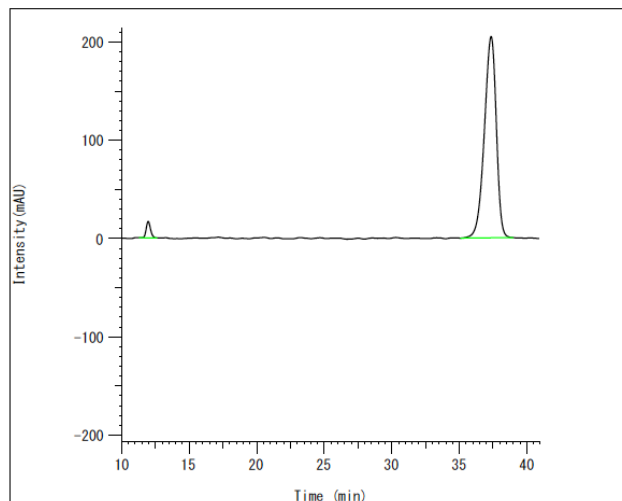

| No. Compounds | RT     | Area     | Area%   |
|---------------|--------|----------|---------|
| 1 Peak 1      | 11.967 | 376775   | 2.903   |
| 2 Peak 2      | 37.353 | 12600372 | 97.097  |
|               |        | 12977147 | 100.000 |

#### Racemate

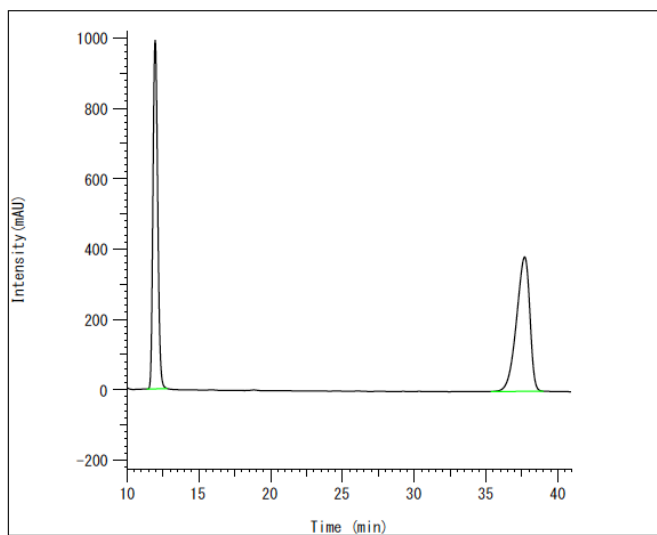

| No. Compounds | RT     | Area     | Area%   |
|---------------|--------|----------|---------|
| 1 Peak 1      | 11.960 | 22742101 | 48.001  |
| 2 Peak 2      | 37.687 | 24636372 | 51.999  |
|               |        | 47378473 | 100.000 |

HPLC: CHIRALPAK® AD-H (4.6 x 250 mm), hexane/2-propanol = 4/1, 0.5 mL/min, 254 nm.

Retention time:  $t_{\text{minor}} = 12.0 \text{ min.}$ ,  $t_{\text{major}} = 37.4 \text{ min.}$

2a

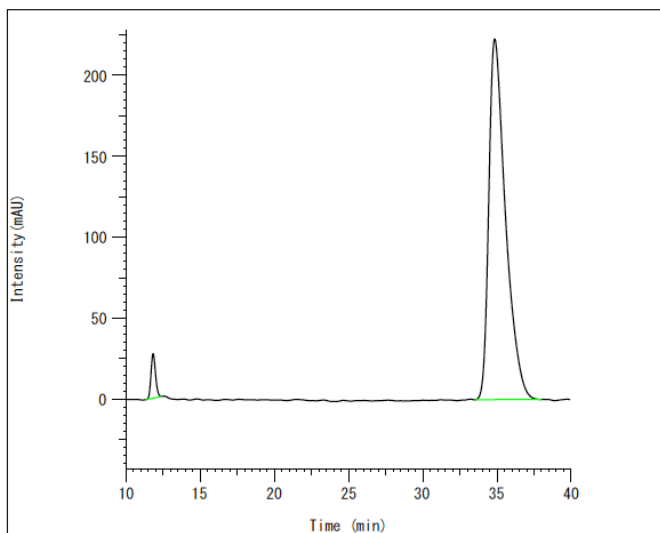

5430 Diode Array Detector SampleID:2 yk\_536\_mono (Extract, 254nm) Repeat:1

| No. Compounds | RT     | Area     | Area%   |
|---------------|--------|----------|---------|
| 1 Peak 1      | 11.827 | 578563   | 3.212   |
| 2 Peak 2      | 34.847 | 17433723 | 96.788  |
|               |        | 18012287 | 100.000 |

Racemate

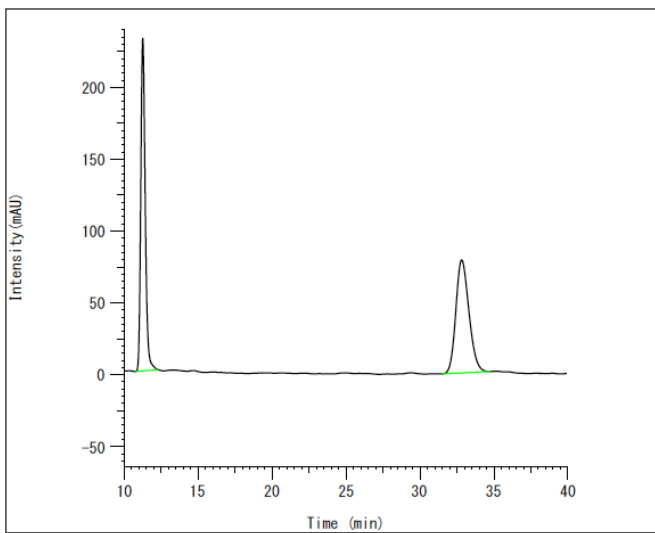

5430 Diode Array Detector SampleID:2 yk\_521\_mono (Extract, 254nm) Repeat:1

| No. Compounds | RT     | Area    | Area%   |
|---------------|--------|---------|---------|
| 1 Peak 1      | 11.253 | 4838654 | 50.009  |
| 2 Peak 2      | 32.820 | 4837001 | 49.991  |
|               |        | 9675655 | 100.000 |

HPLC: CHIRALPAK® AD-H (4.6 x 250 mm), hexane/2-propanol = 4/1, 1.0 mL/min, 254 nm.

Retention time:  $t_{\text{minor}} = 11.8 \text{ min.}$ ,  $t_{\text{major}} = 34.8 \text{ min.}$

1b

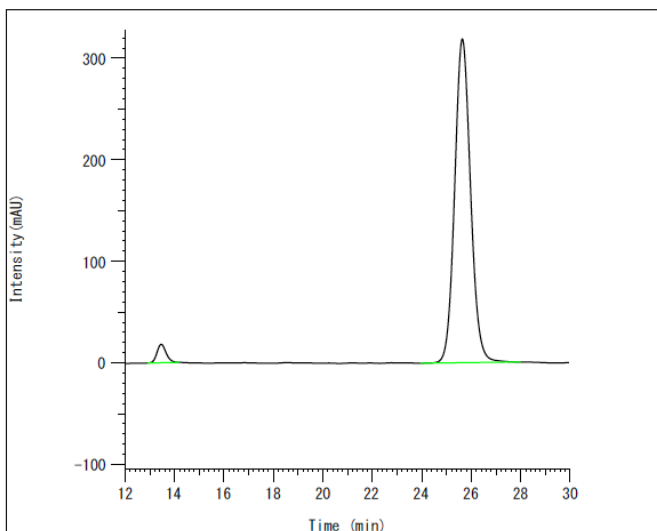

5430 Diode Array Detector SampleID:1 yk\_539\_binam (Extract, 254nm) Repeat:1

| No. Compounds | RT     | Area     | Area%   |
|---------------|--------|----------|---------|
| 1 Peak 1      | 13.460 | 467005   | 3.174   |
| 2 Peak 2      | 25.640 | 14248681 | 96.826  |
|               |        | 14715686 | 100.000 |

Racemate

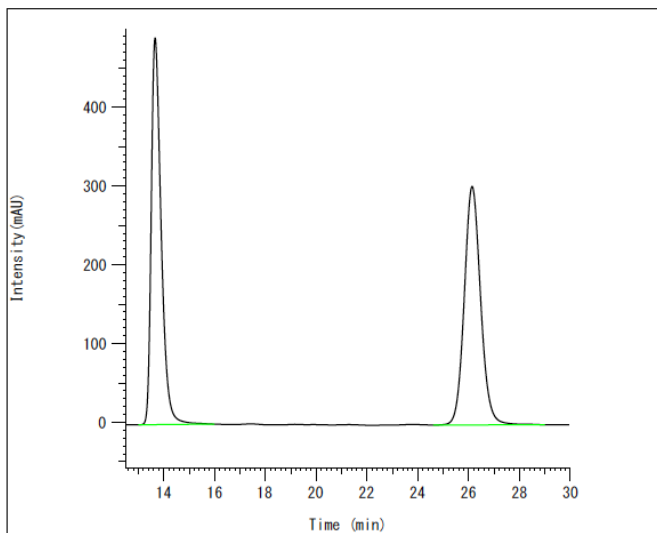

5430 Diode Array Detector SampleID:1 yk\_528\_binam (Extract, 254nm) Repeat:1

| No. Compounds | RT     | Area     | Area%   |
|---------------|--------|----------|---------|
| 1 Peak 1      | 13.660 | 13271758 | 49.478  |
| 2 Peak 2      | 26.133 | 13552022 | 50.522  |
|               |        | 26823780 | 100.000 |

HPLC: CHIRALPAK® AD-H (4.6 x 250 mm), hexane/2-propanol = 4/1, 1.0 mL/min, 254 nm.

Retention time:  $t_{\text{minor}} = 13.5 \text{ min.}$ ,  $t_{\text{major}} = 25.6 \text{ min.}$



2b

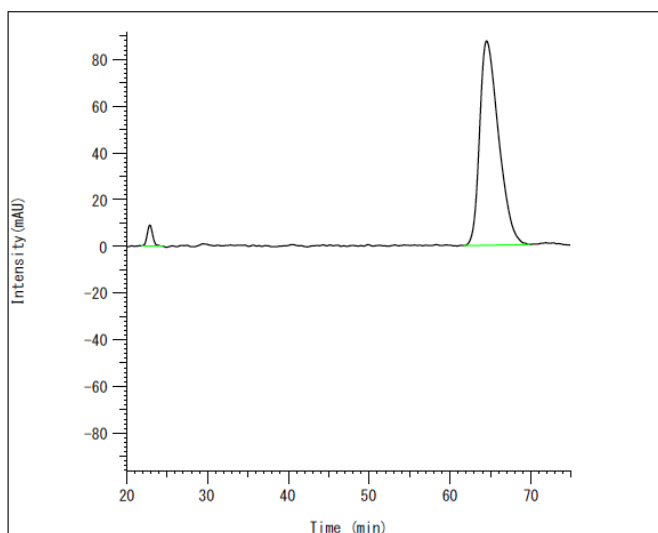

5430 Diode Array Detector SampleID:2 yk\_539\_mono (Extract, 254nm) Repeat:1

| No. Compounds | RT     | Area     | Area%   |
|---------------|--------|----------|---------|
| 1 Peak 1      | 22.867 | 424308   | 2.889   |
| 2 Peak 2      | 64.507 | 14263139 | 97.111  |
|               |        | 14687447 | 100.000 |

Racemate

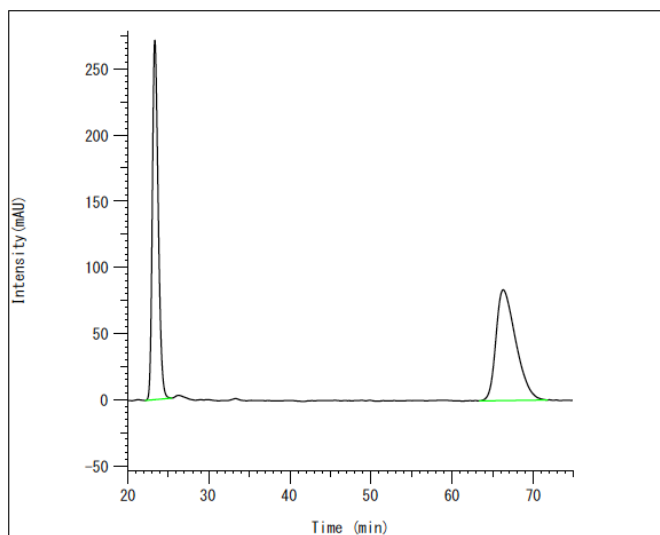

5430 Diode Array Detector SampleID:1 yk\_528\_mono (Extract, 254nm) Repeat:1

| No. Compounds | RT     | Area     | Area%   |
|---------------|--------|----------|---------|
| 1 Peak 1      | 23.347 | 13716825 | 49.121  |
| 2 Peak 2      | 66.300 | 14207466 | 50.879  |
|               |        | 27924290 | 100.000 |

HPLC: CHIRALPAK® AD-H (4.6 x 250 mm), hexane/2-propanol = 4/1, 1.0 mL/min, 254 nm.

Retention time:  $t_{\text{minor}} = 22.3 \text{ min.}$ ,  $t_{\text{major}} = 64.5 \text{ min.}$

1c

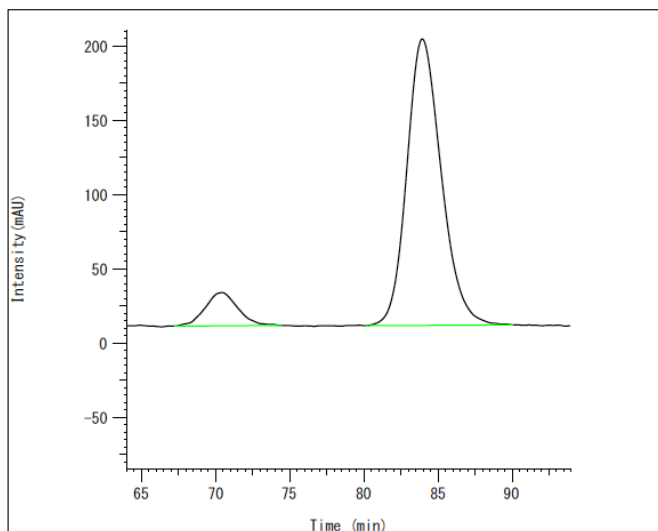

5430 Diode Array Detector SampleID:1 yk\_573\_binam (Extract, 254nm) Repeat:1

| No. Compounds | RT     | Area     | Area%   |
|---------------|--------|----------|---------|
| 1 Peak 1      | 70.427 | 3452421  | 9.953   |
| 2 Peak 2      | 83.940 | 31234445 | 90.047  |
|               |        | 34686867 | 100.000 |

Racemate

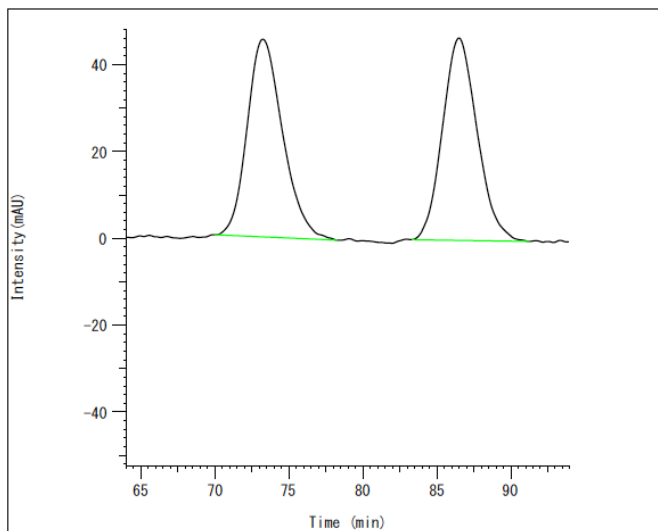

5430 Diode Array Detector SampleID:3 yk\_538\_binam (Extract, 254nm) Repeat:1

| No. Compounds | RT     | Area     | Area%   |
|---------------|--------|----------|---------|
| 1 Peak 1      | 73.240 | 7606351  | 49.987  |
| 2 Peak 2      | 86.493 | 7610443  | 50.013  |
|               |        | 15216793 | 100.000 |

HPLC: CHIRALPAK® AD-H (4.6 x 250 mm), hexane/2-propanol = 4/1, 1.0 mL/min, 254 nm.

Retention time:  $t_{\text{minor}} = 70.4 \text{ min.}$ ,  $t_{\text{major}} = 83.9 \text{ min.}$

2c

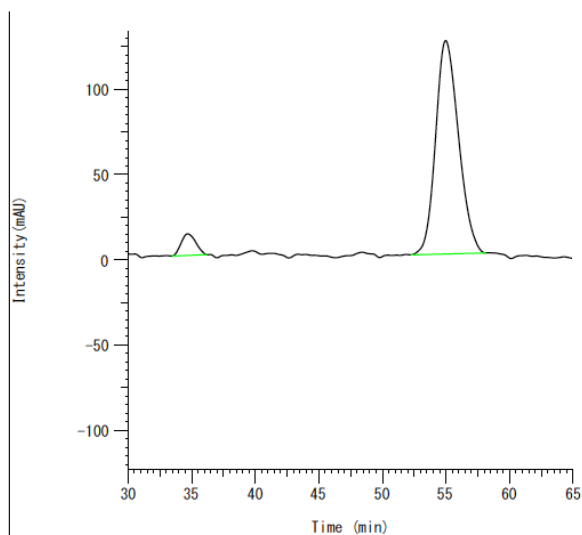

5430 Diode Array Detector SampleID:4 yk\_573\_mono (Extract, 230nm) Repeat:1

| No. Compounds | RT     | Area     | Area%   |
|---------------|--------|----------|---------|
| 1 Peak 1      | 34.673 | 1014020  | 6.065   |
| 2 Peak 2      | 54.980 | 15705235 | 93.935  |
|               |        | 16719255 | 100.000 |

Racemate

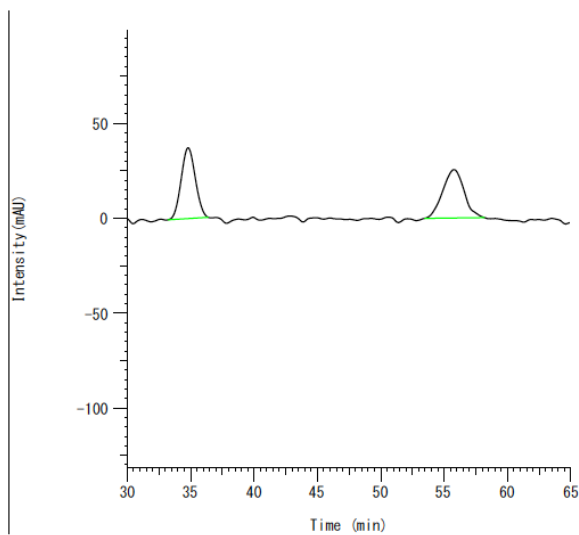

5430 Diode Array Detector SampleID:3 yk\_538\_mono (Extract, 230nm) Repeat:1

| No. Compounds | RT     | Area    | Area%   |
|---------------|--------|---------|---------|
| 1 Peak 1      | 34.800 | 2901866 | 49.309  |
| 2 Peak 2      | 55.787 | 2983214 | 50.691  |
|               |        | 5885080 | 100.000 |

HPLC: CHIRALPAK® AD-H (4.6 x 250 mm), hexane/2-propanol = 4/1, 1.0 mL/min, 230 nm.

Retention time:  $t_{\text{minor}} = 34.7$  min.,  $t_{\text{major}} = 55.0$  min.

1d

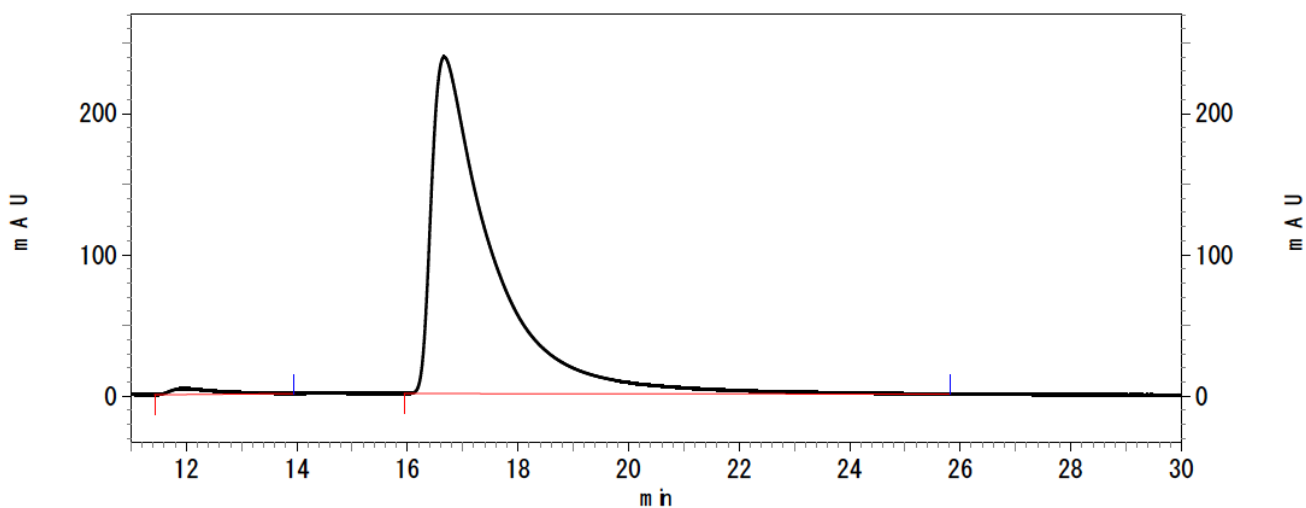

| Pk # | Retention time | Area     | Area%  | Baseline code |
|------|----------------|----------|--------|---------------|
| 1    | 11.960         | 1024154  | 1.404  | BB            |
| 2    | 16.667         | 71935349 | 98.596 | BB            |

Racemate

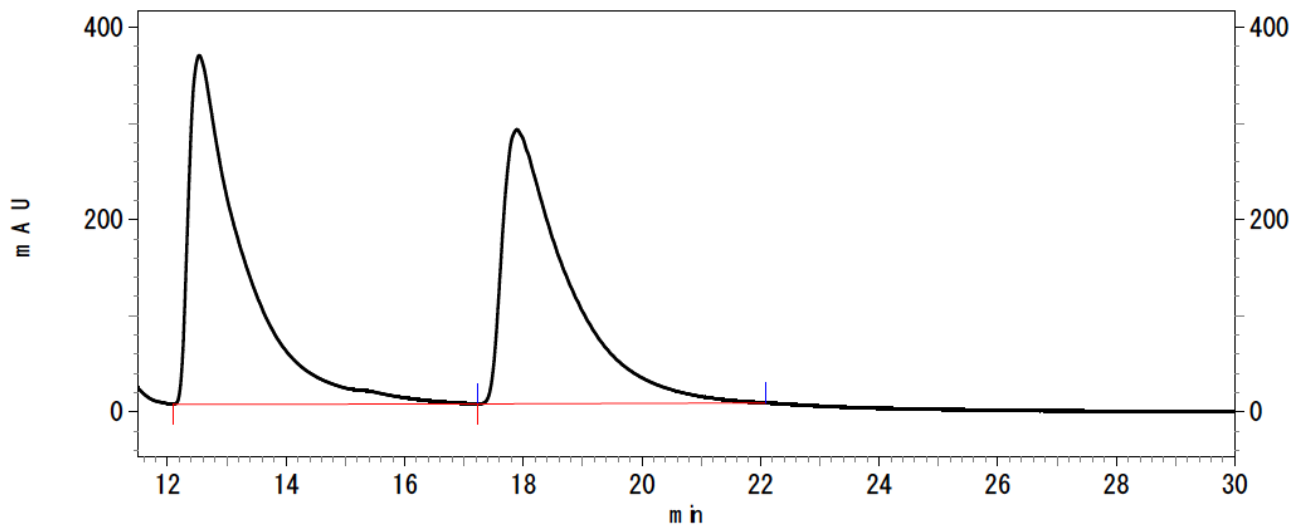

| Pk # | Retention time | Area     | Area%  | Baseline code |
|------|----------------|----------|--------|---------------|
| 1    | 12.533         | 90080115 | 51.232 | BB            |
| 2    | 17.893         | 85747059 | 48.768 | BB            |

HPLC: CHIRALPAK® IA-3 (4.6 x 250 mm), hexane/2-propanol = 100/1, 0.5 mL/min, 254 nm.

Retention time:  $t_{\text{minor}} = 12.0$  min.,  $t_{\text{major}} = 16.7$  min.

2d

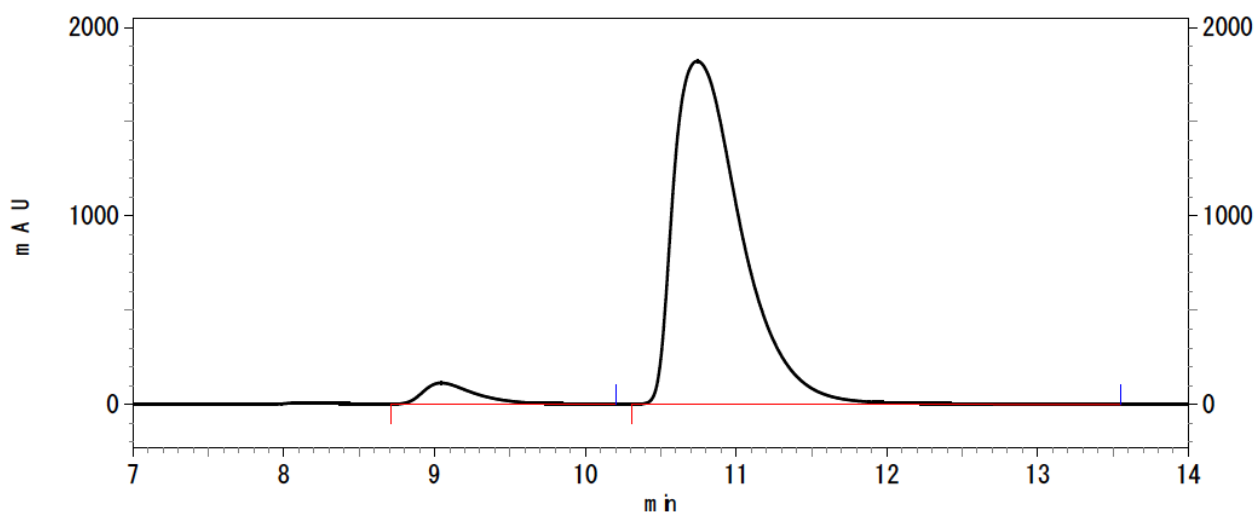

| Pk # | Retention time | Area      | Area%  | Baseline code |
|------|----------------|-----------|--------|---------------|
| 1    | 9.047          | 11004076  | 4.639  | BB            |
| 2    | 10.747         | 226204614 | 95.361 | BB            |

Racemate

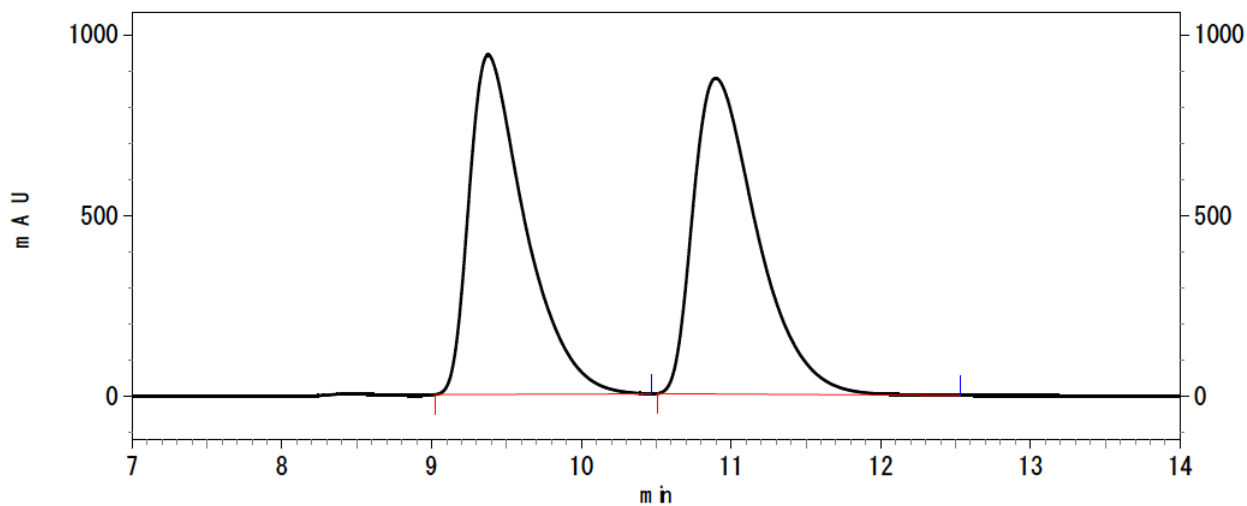

| Pk # | Retention time | Area      | Area%  | Baseline code |
|------|----------------|-----------|--------|---------------|
| 1    | 9.380          | 97824521  | 48.557 | BB            |
| 2    | 10.900         | 103639974 | 51.443 | BB            |

HPLC: CHIRALPAK® IA-3 (4.6 x 250 mm), hexane/2-propanol = 100/1, 1.0 mL/min, 254 nm.

Retention time:  $t_{\text{minor}} = 9.0$  min.,  $t_{\text{major}} = 10.7$  min.

1e

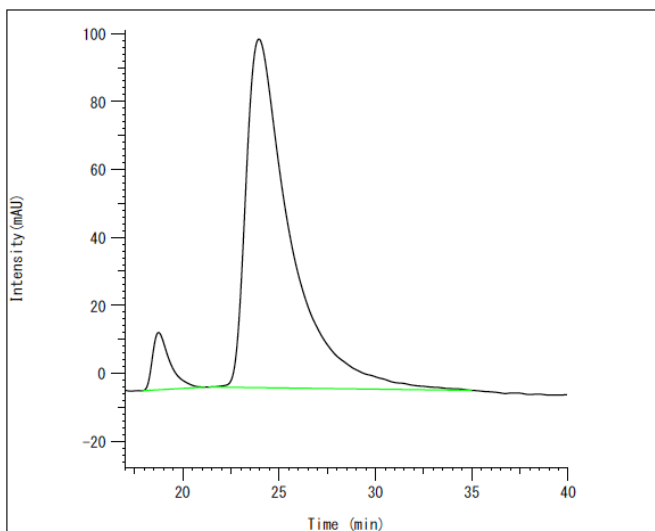

5430 Diode Array Detector SampleID:1 yk\_558\_binam (Extract, 254nm) Repeat:1

| No. Compounds | RT     | Area     | Area%   |
|---------------|--------|----------|---------|
| 1 Peak 1      | 18.747 | 1057976  | 6.086   |
| 2 Peak 2      | 23.940 | 16325746 | 93.914  |
|               |        | 17383722 | 100.000 |

Racemate

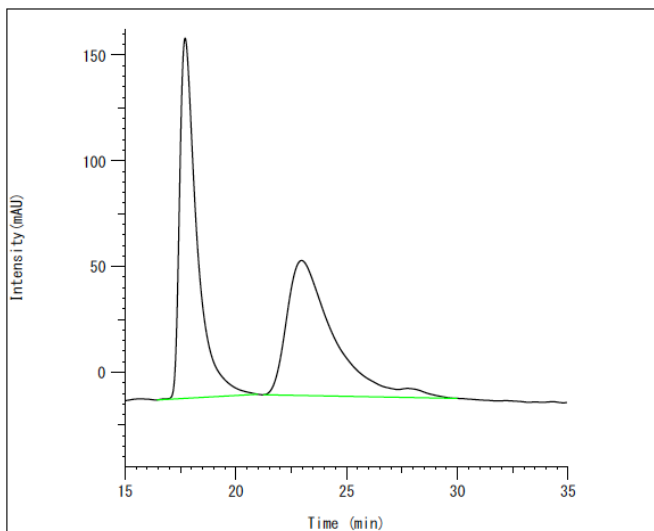

5430 Diode Array Detector SampleID:1 yk\_556\_binam (Extract, 254nm) Repeat:1

| No. Compounds | RT     | Area     | Area%   |
|---------------|--------|----------|---------|
| 1 Peak 1      | 17.713 | 9239359  | 49.735  |
| 2 Peak 2      | 22.967 | 9337888  | 50.265  |
|               |        | 18577246 | 100.000 |

HPLC: CHIRALPAK® IF-3 (4.6 x 250 mm), hexane/2-propanol = 9/1, 1.0 mL/min, 254 nm.

Retention time:  $t_{\text{minor}} = 18.7 \text{ min.}$ ,  $t_{\text{major}} = 23.9 \text{ min.}$

2e

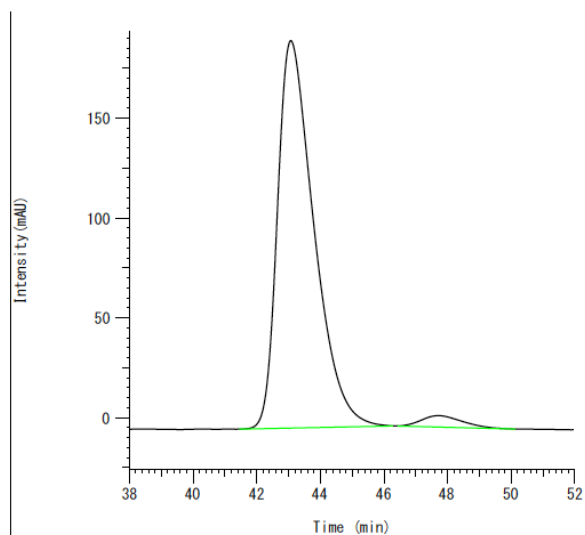

5430 Diode Array Detector SampleID:1 yk\_558\_mono (Extract, 254nm) Repeat:1

| No. Compounds | RT     | Area     | Area%   |
|---------------|--------|----------|---------|
| 1 Peak 1      | 43.073 | 15404773 | 96.776  |
| 2 Peak 2      | 47.733 | 513119   | 3.224   |
|               |        | 15917892 | 100.000 |

**Racemate**

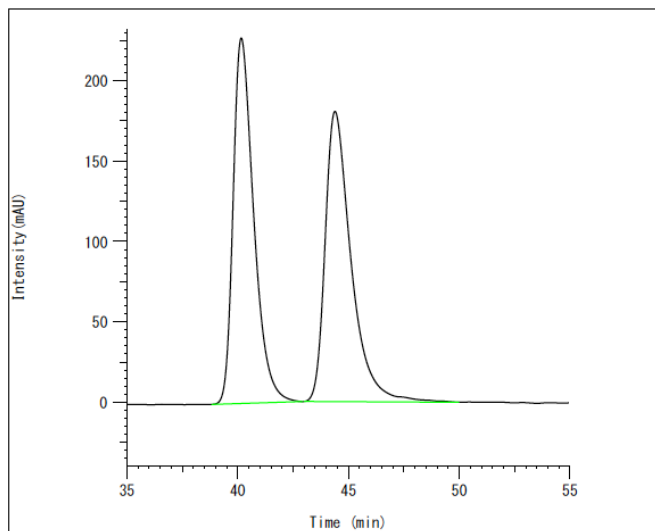

5430 Diode Array Detector SampleID:2 yk\_556\_mono (Extract, 254nm) Repeat:1

| No. Compounds | RT     | Area     | Area%   |
|---------------|--------|----------|---------|
| 1 Peak 1      | 40.160 | 14654603 | 49.901  |
| 2 Peak 2      | 44.393 | 14712647 | 50.099  |
|               |        | 29367249 | 100.000 |

HPLC: CHIRALPAK® IF-3 (4.6 x 250 mm), hexane/2-propanol = 9/1, 1.0 mL/min, 254 nm.

Retention time:  $t_{\text{major}} = 43.1$  min.,  $t_{\text{minor}} = 47.7$  min.

1f

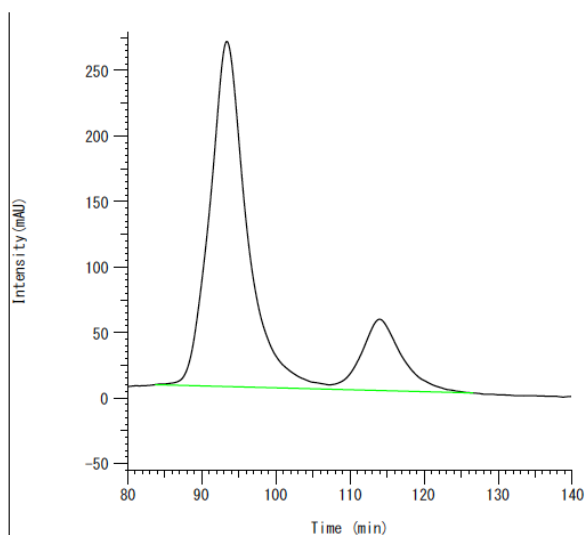

5430 Diode Array Detector SampleID:2 yk\_66-OMePh\_binam\_2 (Extract, 254nm) Repeat:1

| No. Compounds | RT      | Area      | Area%   |
|---------------|---------|-----------|---------|
| 1 Peak 1      | 93.367  | 92245129  | 81.575  |
| 2 Peak 2      | 113.973 | 20834746  | 18.425  |
|               |         | 113079876 | 100.000 |

Racemate

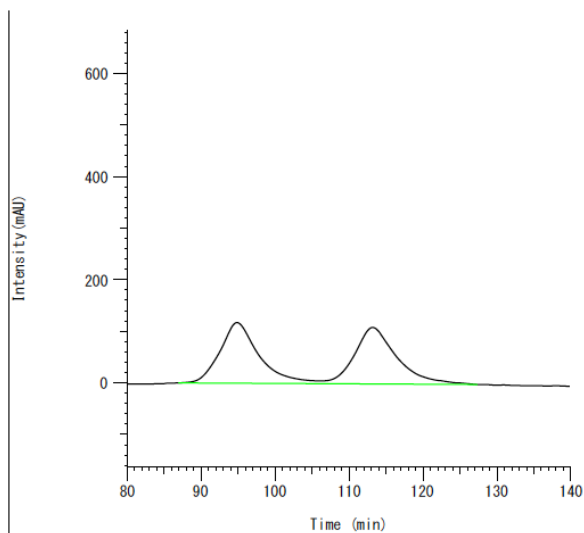

5430 Diode Array Detector SampleID:2 yk\_66-OMePh\_binam\_2 (Extract, 254nm) Repeat:1

| No. Compounds | RT      | Area     | Area%   |
|---------------|---------|----------|---------|
| 1 Peak 1      | 94.847  | 43416477 | 49.937  |
| 2 Peak 2      | 113.193 | 43525352 | 50.063  |
|               |         | 86941829 | 100.000 |

HPLC: CHIRALCEL® OD-H (4.6 x 250 mm), hexane/2-propanol = 4/1, 0.5 mL/min, 300 nm.

Retention time:  $t_{\text{major}} = 93.4 \text{ min.}$ ,  $t_{\text{minor}} = 114.0 \text{ min.}$



2f

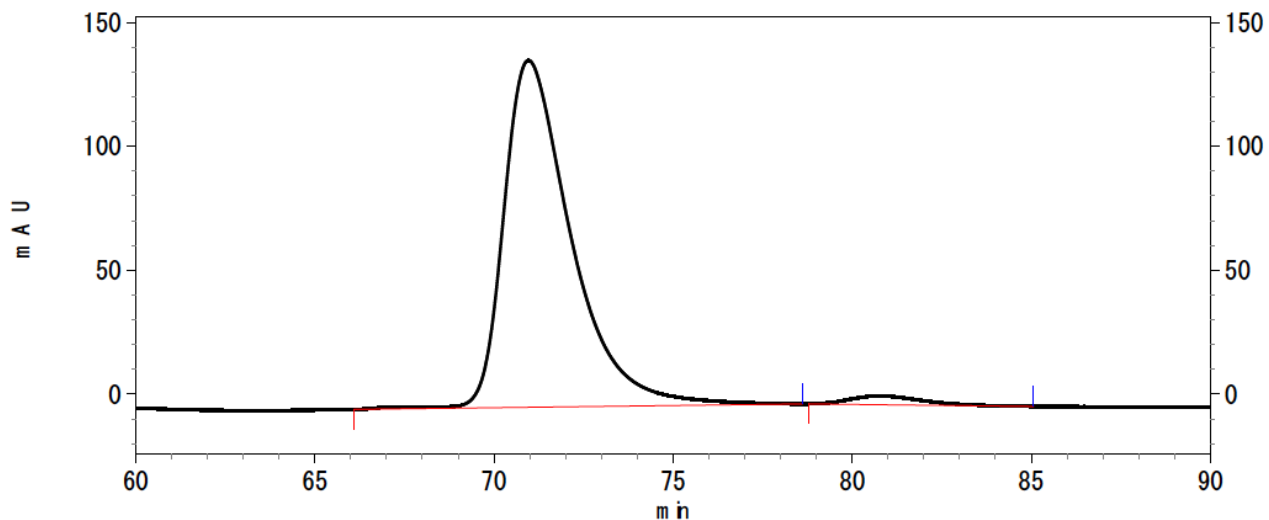

| Pk # | Retention time | Area     | Area%  | Baseline code |
|------|----------------|----------|--------|---------------|
| 1    | 70.967         | 73298413 | 97.376 | BB            |
| 2    | 80.800         | 1975175  | 2.624  | BB            |

Racemate

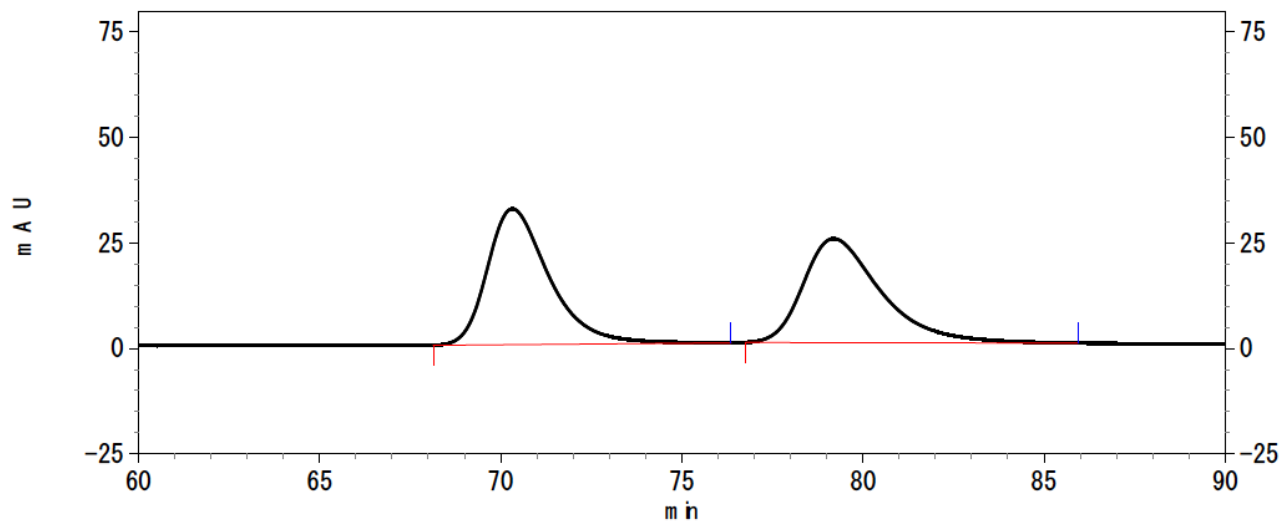

| Pk # | Retention time | Area     | Area%  | Baseline code |
|------|----------------|----------|--------|---------------|
| 1    | 70.327         | 15321798 | 51.054 | BB            |
| 2    | 79.193         | 14689238 | 48.946 | BB            |

HPLC: CHIRALPAK® IF-3 (4.6 x 250 mm), hexane/2-propanol = 9/1, 1.0 mL/min, 254 nm.

Retention time:  $t_{\text{major}} = 70.1 \text{ min.}$ ,  $t_{\text{minor}} = 80.8 \text{ min.}$

1g

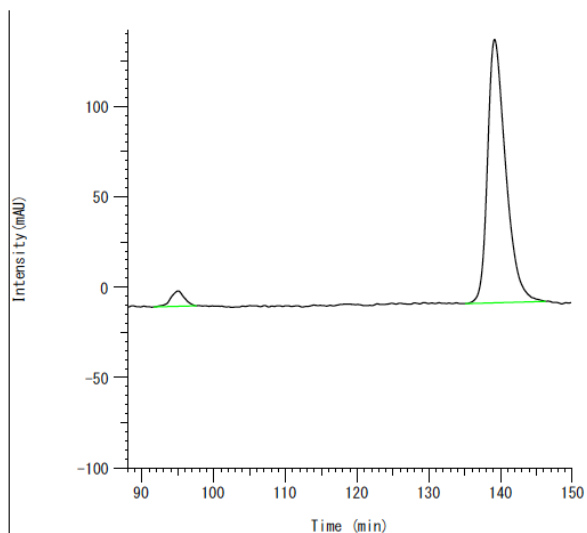

5430 Diode Array Detector SampleID:1 yk\_570\_binam (Extract, 254nm) Repeat:1

| No. Compounds | RT      | Area     | Area%   |
|---------------|---------|----------|---------|
| 1 Peak 1      | 95.027  | 1126246  | 4.207   |
| 2 Peak 2      | 139.160 | 25646940 | 95.793  |
|               |         | 26773185 | 100.000 |

Racemate

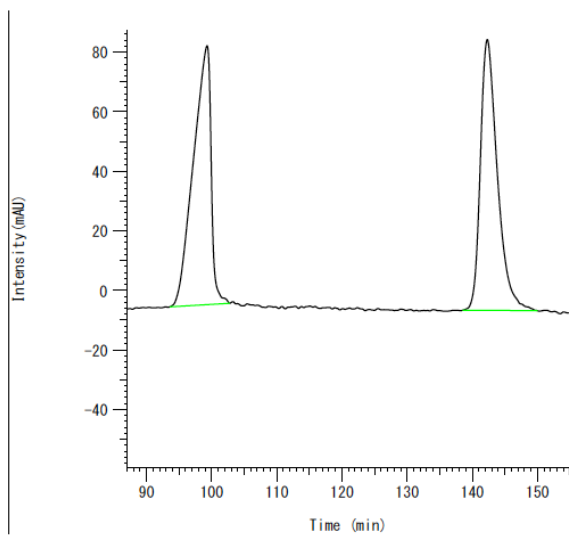

5430 Diode Array Detector SampleID:1 yk\_560\_binam (Extract, 254nm) Repeat:1

| No. Compounds | RT      | Area     | Area%   |
|---------------|---------|----------|---------|
| 1 Peak 1      | 99.293  | 16439021 | 49.915  |
| 2 Peak 2      | 142.300 | 16495023 | 50.085  |
|               |         | 32934044 | 100.000 |

HPLC: CHIRALPAK® IA-3 (4.6 x 250 mm), hexane/2-propanol = 4/1, 1.0 mL/min, 254 nm.

Retention time:  $t_{\text{minor}} = 95.0 \text{ min.}$ ,  $t_{\text{major}} = 139.2 \text{ min.}$

2g

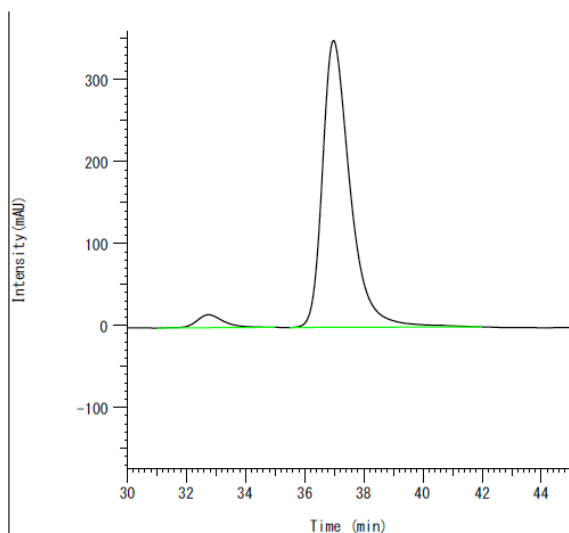

5430 Diode Array Detector SampleID:3 yk\_570\_mono (Extract, 254nm) Repeat:1

| No. Compounds | RT     | Area     | Area%   |
|---------------|--------|----------|---------|
| 1 Peak 1      | 32.753 | 998226   | 4.201   |
| 2 Peak 2      | 36.973 | 22762750 | 95.799  |
|               |        | 23760977 | 100.000 |

Racemate

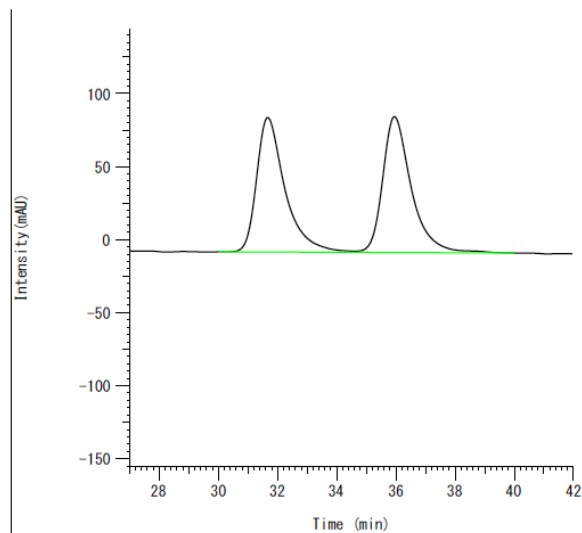

5430 Diode Array Detector SampleID:5 yk\_560\_mono\_3 (Extract, 254nm) Repeat:1

| No. Compounds | RT     | Area     | Area%   |
|---------------|--------|----------|---------|
| 1 Peak 1      | 31.667 | 6129162  | 49.517  |
| 2 Peak 2      | 35.953 | 6248847  | 50.483  |
|               |        | 12378009 | 100.000 |

HPLC: CHIRALPAK® IF-3 (4.6 x 250 mm), hexane/2-propanol = 4/1, 1.0 mL/min, 254 nm.

Retention time:  $t_{\text{minor}} = 32.8 \text{ min.}$ ,  $t_{\text{major}} = 37.0 \text{ min.}$

1h

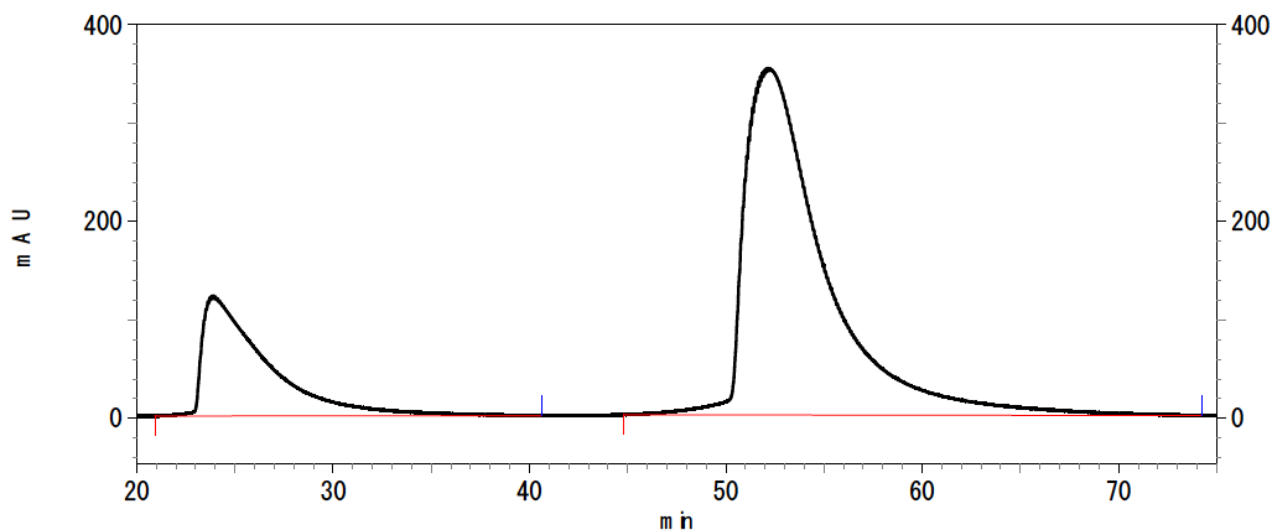

| Pk # | Retention time | Area      | Area%  | Baseline code |
|------|----------------|-----------|--------|---------------|
| 1    | 23.913         | 110150420 | 21.668 | BB            |
| 2    | 52.153         | 398213075 | 78.332 | BB            |

Racemate

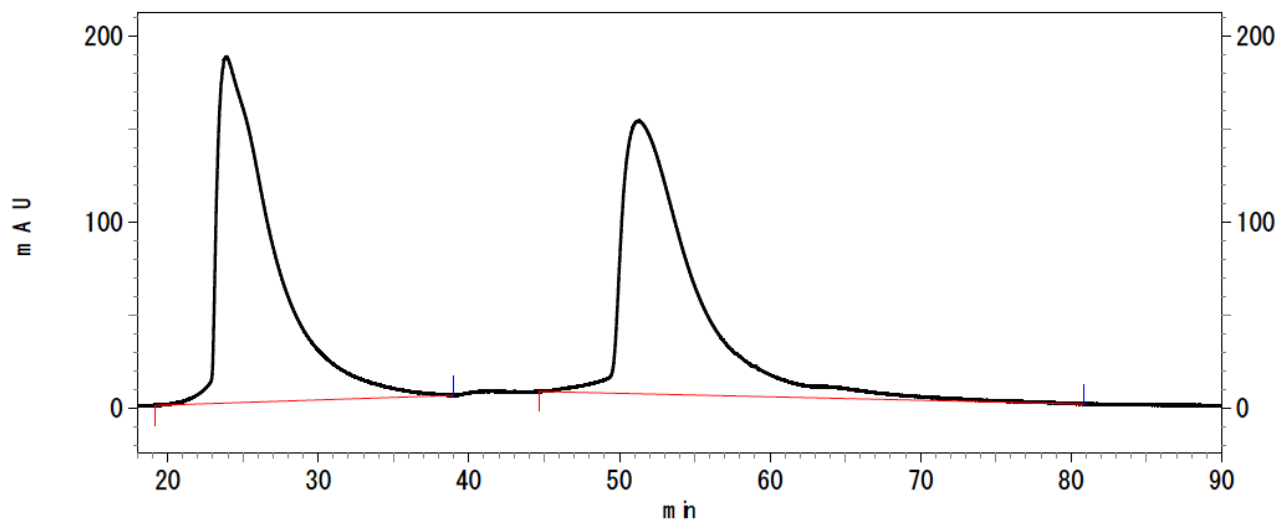

| Pk # | Retention time | Area      | Area%  | Baseline code |
|------|----------------|-----------|--------|---------------|
| 1    | 23.940         | 189842323 | 49.863 | BB            |
| 2    | 51.267         | 190884981 | 50.137 | BB            |

HPLC: CHIRALPAK®IA-3 (4.6 x 250 mm), hexane/2-propanol = 100/1, 1.0 mL/min, 254 nm.

Retention time:  $t_{\text{minor}} = 23.9 \text{ min.}$ ,  $t_{\text{major}} = 52.2 \text{ min.}$

2h

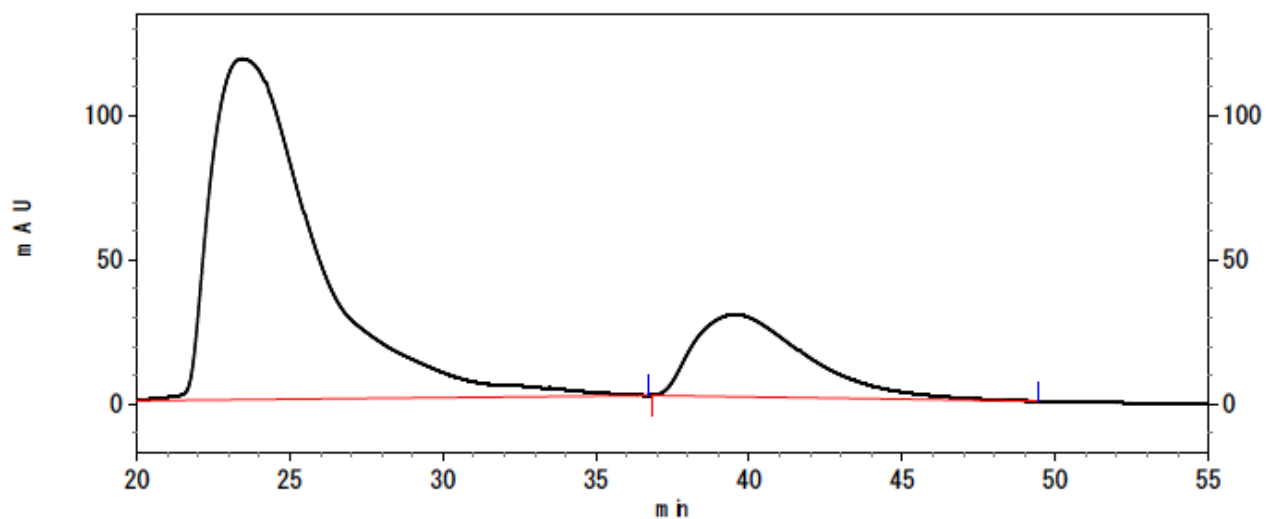

| Pk # | Retention time | Area      | Area%  | Baseline code |
|------|----------------|-----------|--------|---------------|
| 1    | 23.473         | 113429511 | 79.556 | BB            |
| 2    | 39.540         | 29149314  | 20.444 | BB            |

Racemate

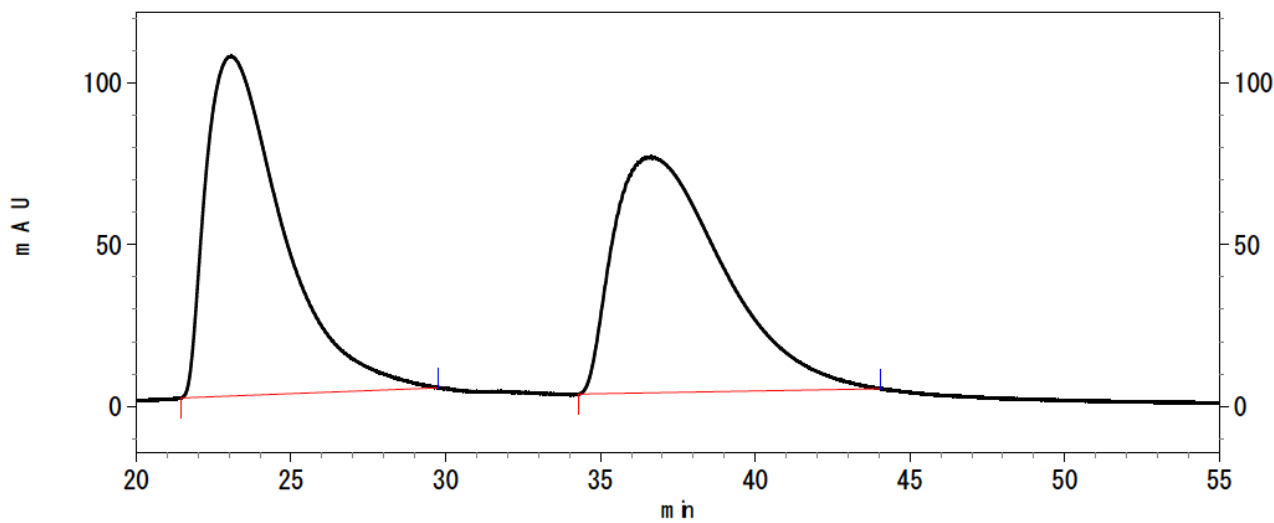

| Pk # | Retention time | Area     | Area%  | Baseline code |
|------|----------------|----------|--------|---------------|
| 1    | 23.080         | 72398537 | 50.191 | BB            |
| 2    | 36.633         | 71847965 | 49.809 | BB            |

HPLC: CHIRALPAK® IA-3 (4.6 x 250 mm), hexane/2-propanol = 100/1, 1.0 mL/min, 254 nm.

Retention time:  $t_{\text{major}} = 23.5 \text{ min.}$ ,  $t_{\text{minor}} = 39.5 \text{ min.}$

1i

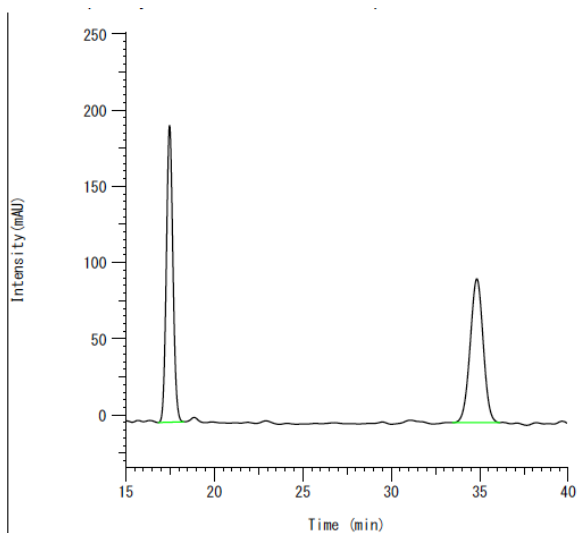

5430 Diode Array Detector SampleID:1 yk\_596\_binam (Extract, 254nm) Repeat:1

| No. Compounds | RT     | Area    | Area%   |
|---------------|--------|---------|---------|
| 1 Peak 1      | 17.473 | 5003974 | 50.855  |
| 2 Peak 2      | 34.840 | 4835631 | 49.145  |
|               |        | 9839605 | 100.000 |

### Racemate

HPLC: CHIRALCEL® AD-H (4.6 x 250 mm), hexane/2-propanol = 9/1, 1.0 mL/min, 254 nm.

Retention time:  $t_{\text{major}} = 17.5 \text{ min.}$ ,  $t_{\text{minor}} = 34.8 \text{ min.}$

2i

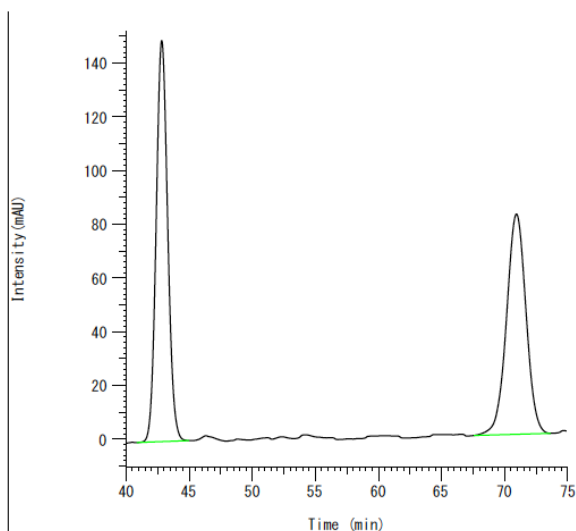

5430 Diode Array Detector SampleID:2 yk\_596\_mono (Extract, 220nm) Repeat:1

| No. Compounds | RT     | Area     | Area%   |
|---------------|--------|----------|---------|
| 1 Peak 1      | 42.827 | 9458797  | 51.765  |
| 2 Peak 2      | 70.933 | 8813604  | 48.235  |
|               |        | 18272401 | 100.000 |

### Racemate

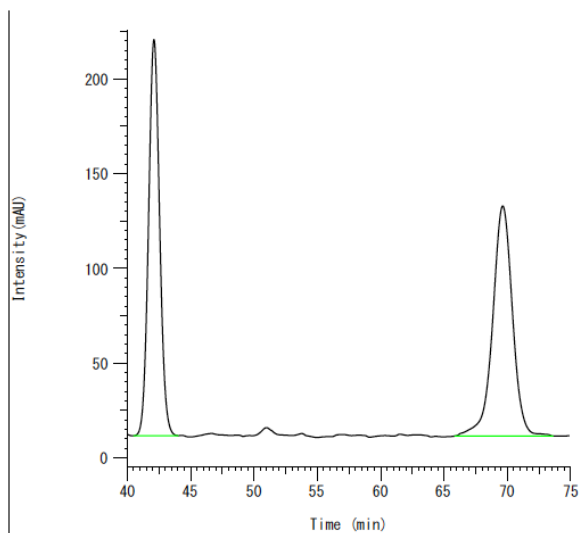

5430 Diode Array Detector SampleID:3 yk\_697\_mono (Extract, 220nm) Repeat:1

| No. Compounds | RT     | Area     | Area%   |
|---------------|--------|----------|---------|
| 1 Peak 1      | 42.107 | 12678908 | 48.906  |
| 2 Peak 2      | 69.633 | 13246151 | 51.094  |
|               |        | 25925059 | 100.000 |

HPLC: CHIRALCEL® AD-H (4.6 x 250 mm), hexane/2-propanol = 99/1, 1.0 mL/min, 220 nm.

Retention time:  $t_{\text{major}} = 42.8 \text{ min.}$ ,  $t_{\text{minor}} = 70.9 \text{ min.}$

## 4. NMR spectra

(S)-1a

$^1\text{H}$  NMR (400 MHz,  $\text{CDCl}_3$ )

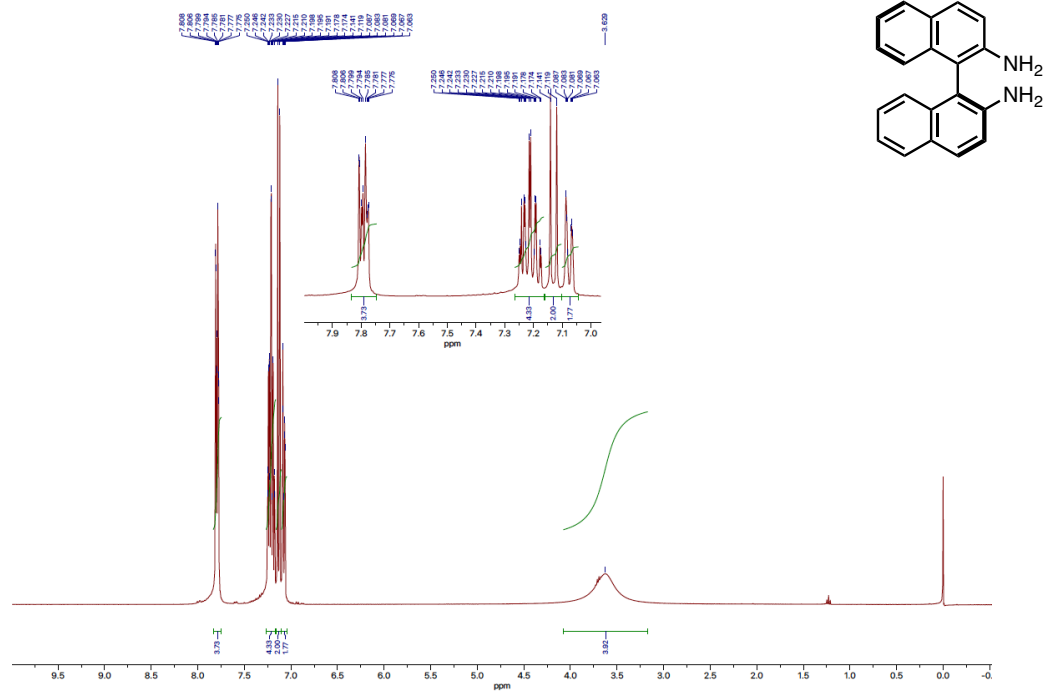

$^{13}\text{C}$  NMR (101 MHz,  $\text{CDCl}_3$ )

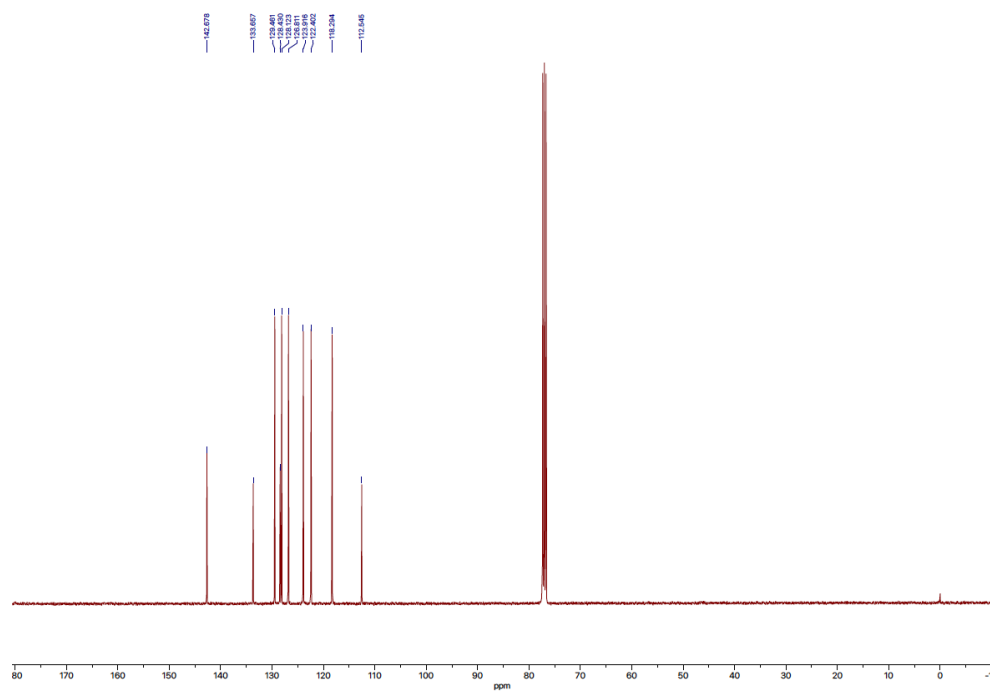



**(R)-2a**

**<sup>1</sup>H NMR (400 MHz, CDCl<sub>3</sub>)**

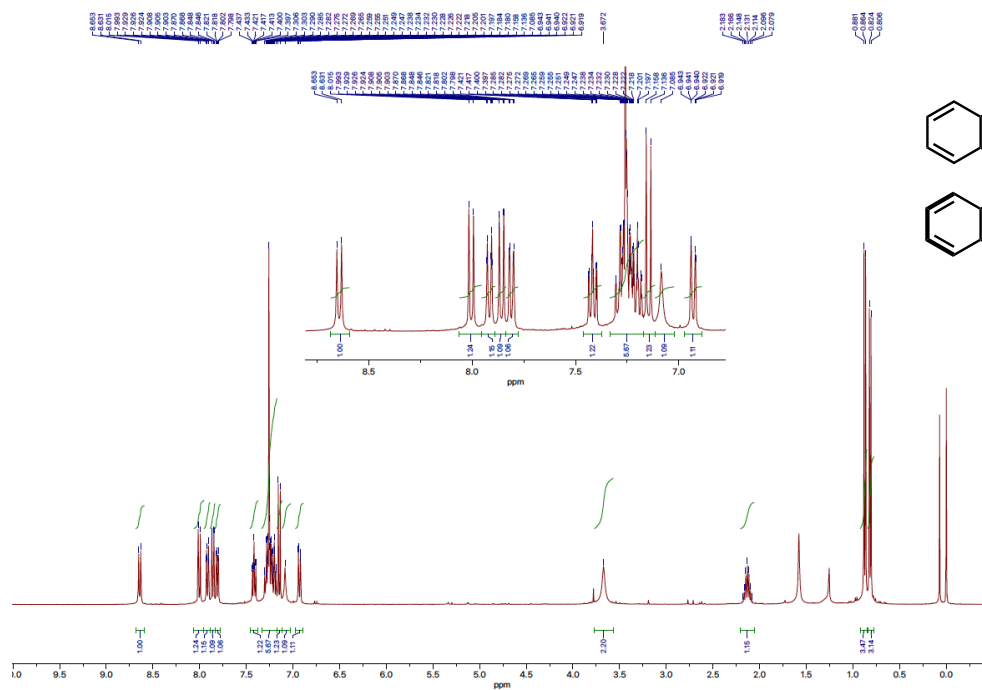

**<sup>13</sup>C NMR (101 MHz, CDCl<sub>3</sub>)**

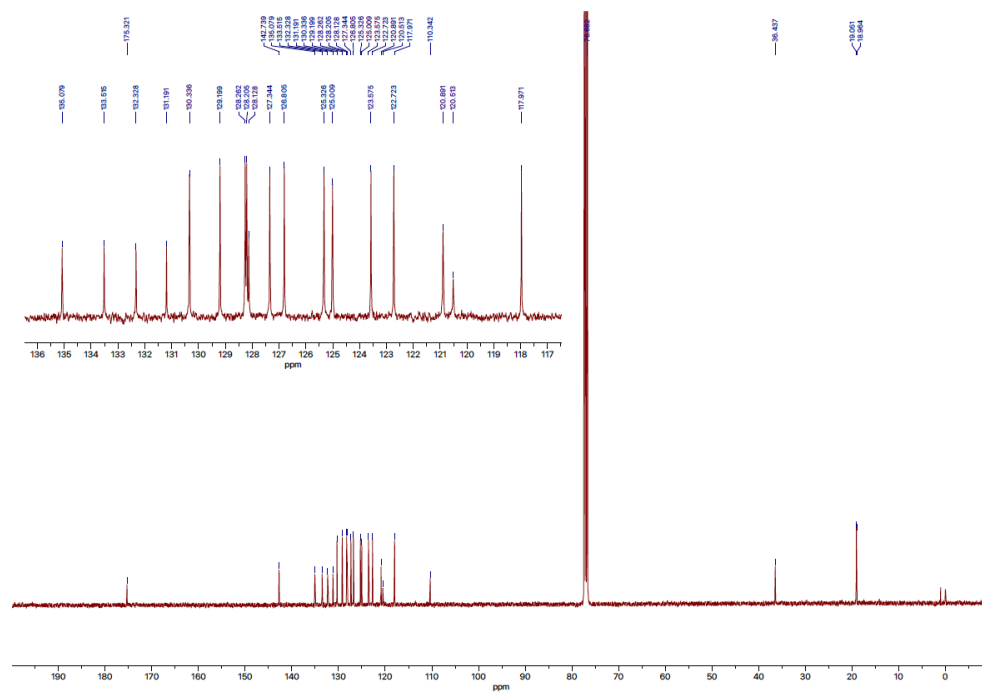

**(S)-1b**

**<sup>1</sup>H NMR (400 MHz, CDCl<sub>3</sub>)**

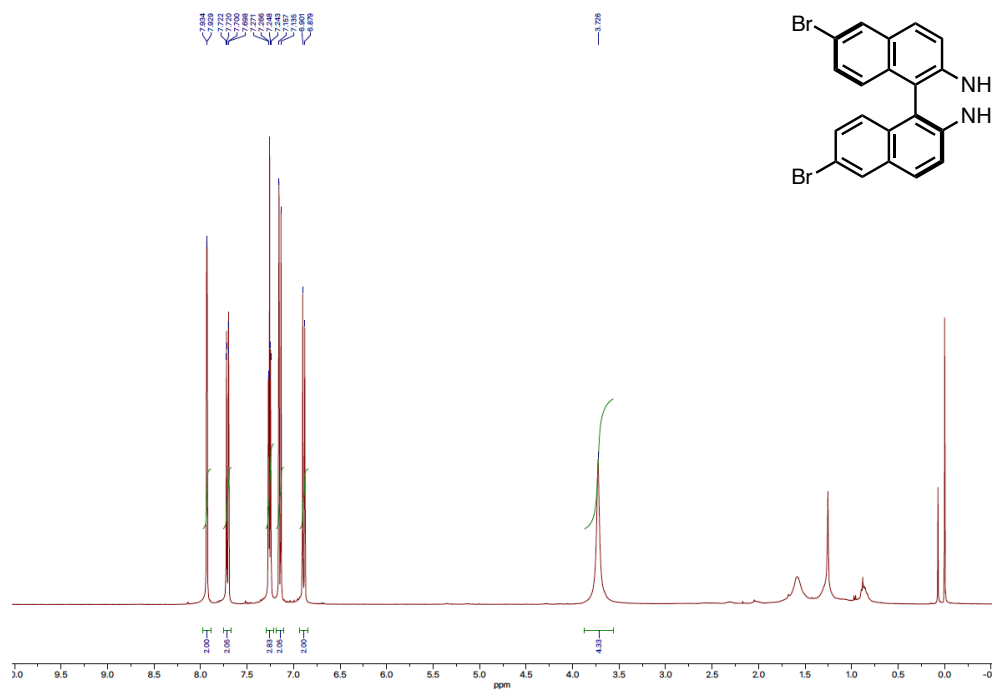

**<sup>13</sup>C NMR (101 MHz, CDCl<sub>3</sub>)**

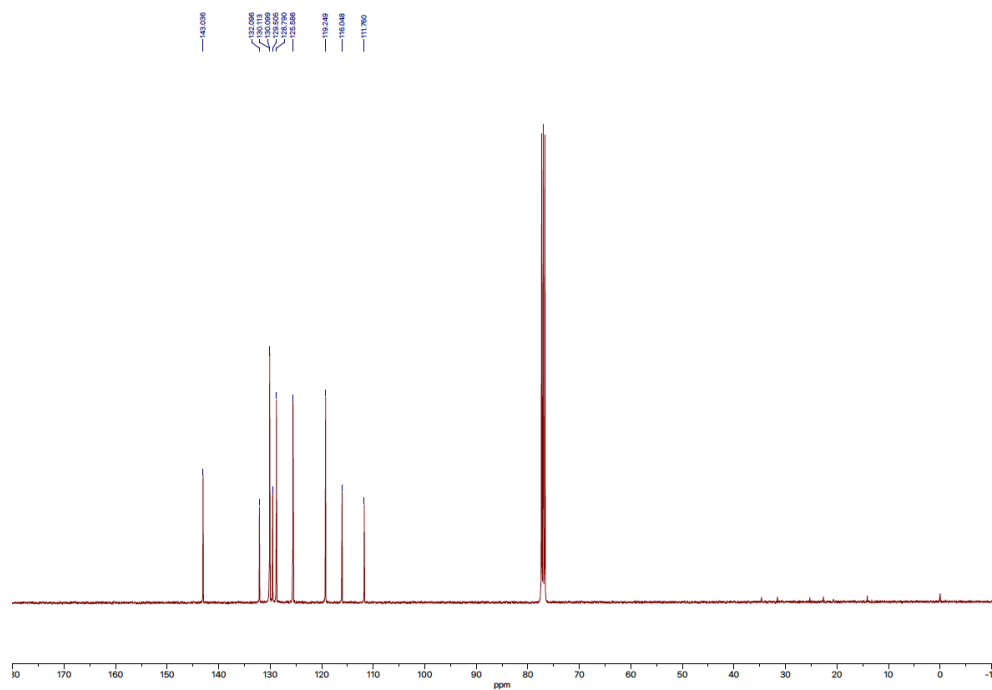

(R)-2b

<sup>1</sup>H NMR (400 MHz, CDCl<sub>3</sub>)

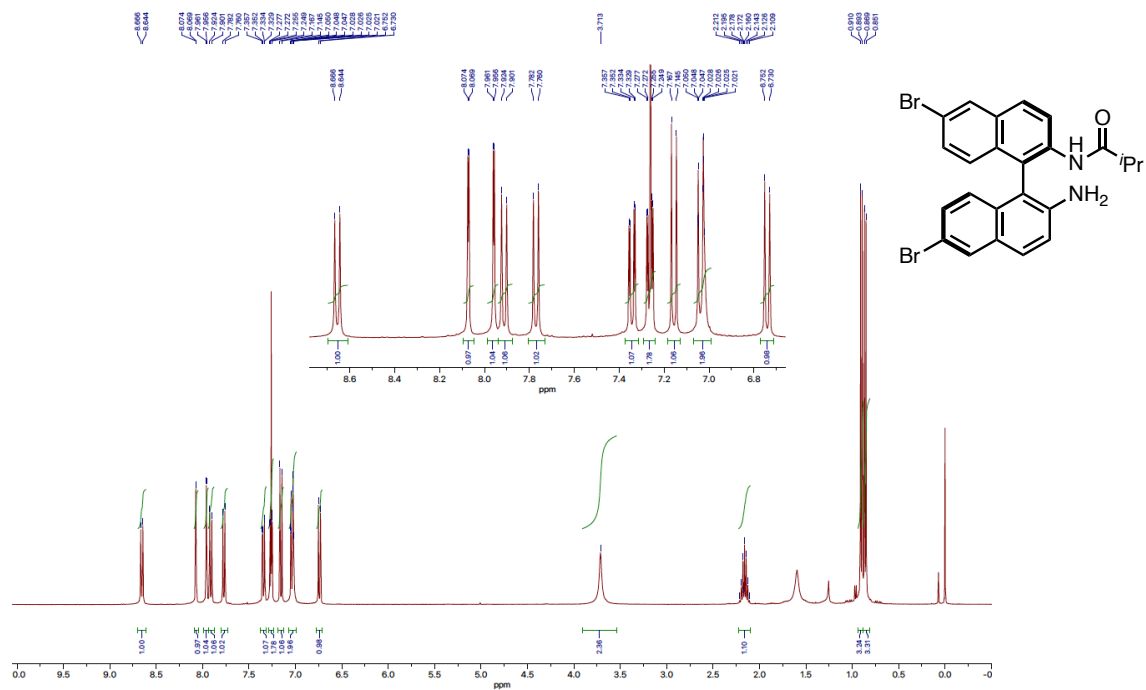

<sup>13</sup>C NMR (101 MHz, CDCl<sub>3</sub>)

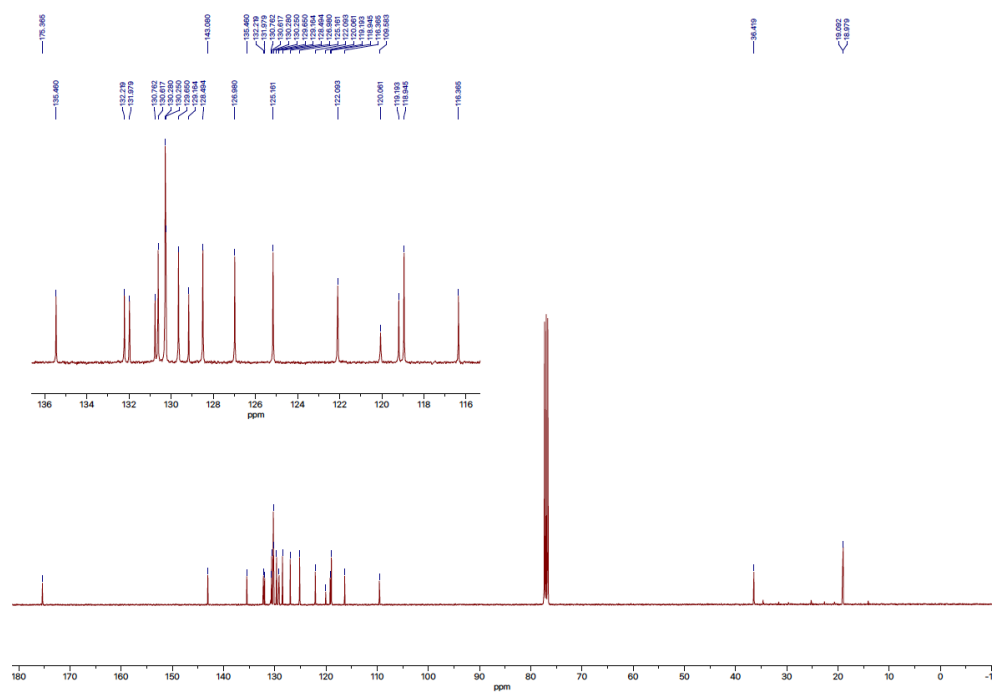

(S)-1c

<sup>1</sup>H NMR (400 MHz, CDCl<sub>3</sub>)

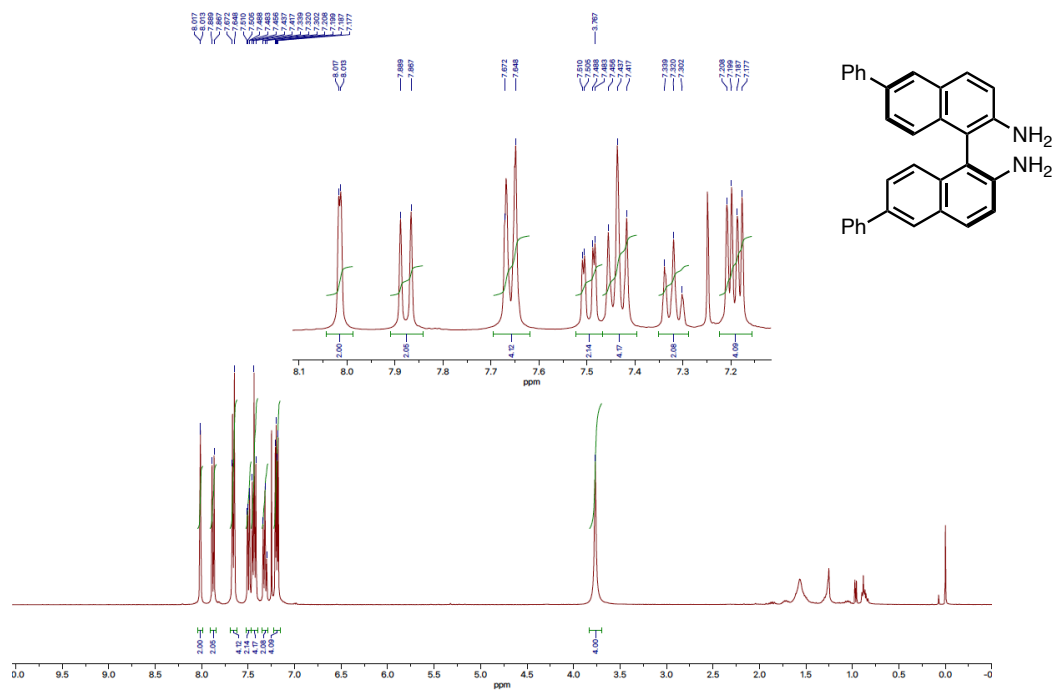

<sup>13</sup>C NMR (101 MHz, CDCl<sub>3</sub>)

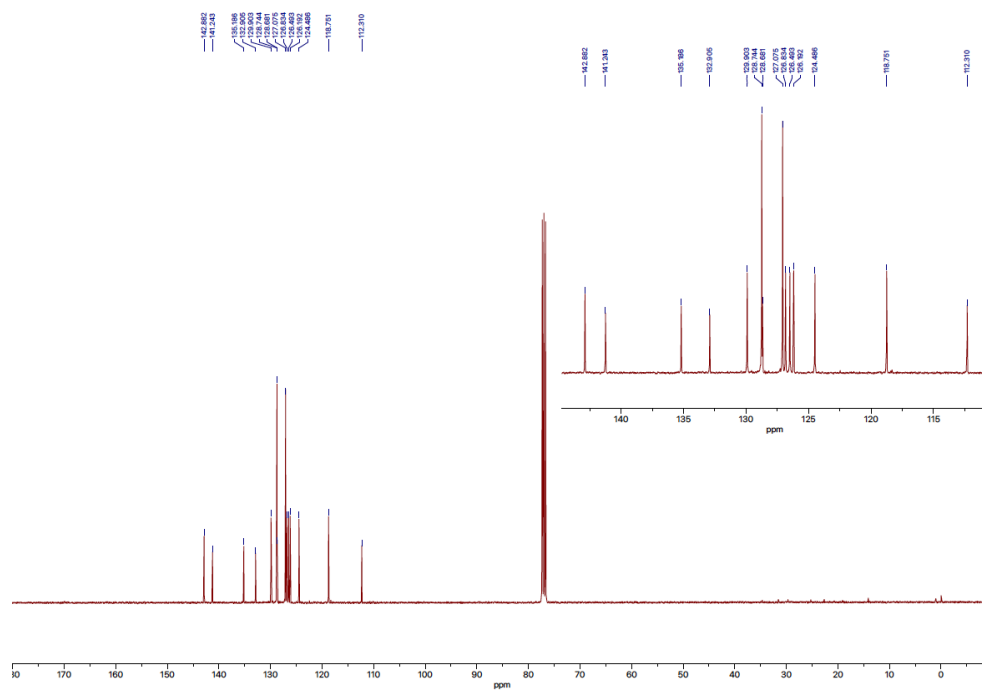

(R)-2c

<sup>1</sup>H NMR (400 MHz, CDCl<sub>3</sub>)

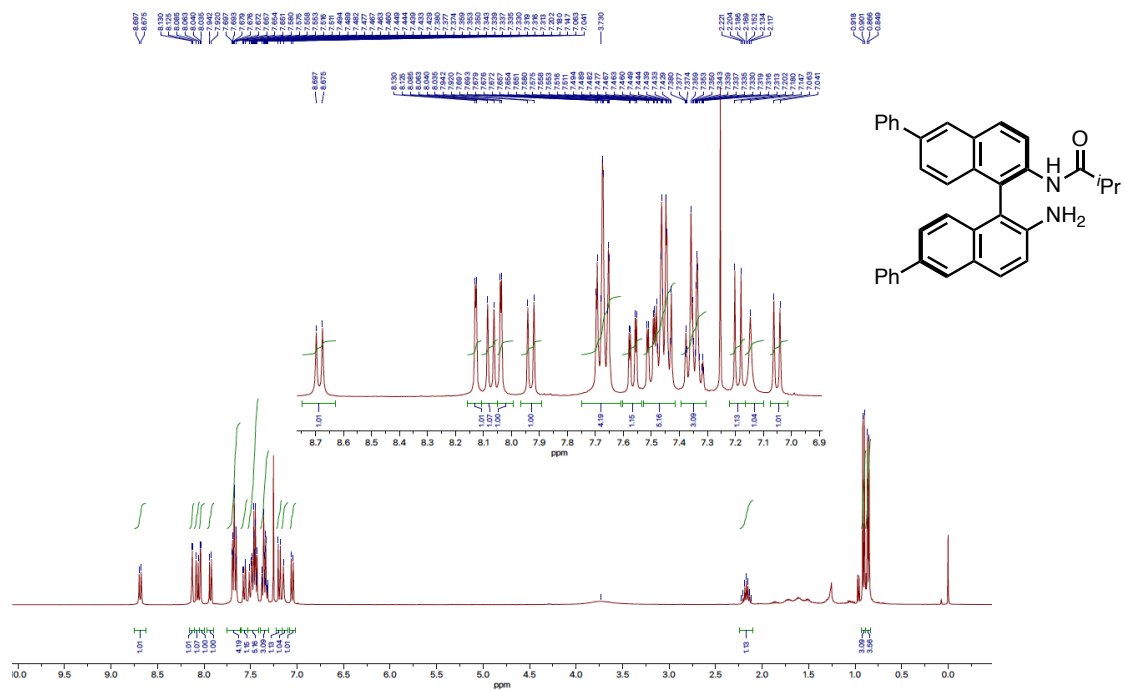

<sup>13</sup>C NMR (101 MHz, CDCl<sub>3</sub>)

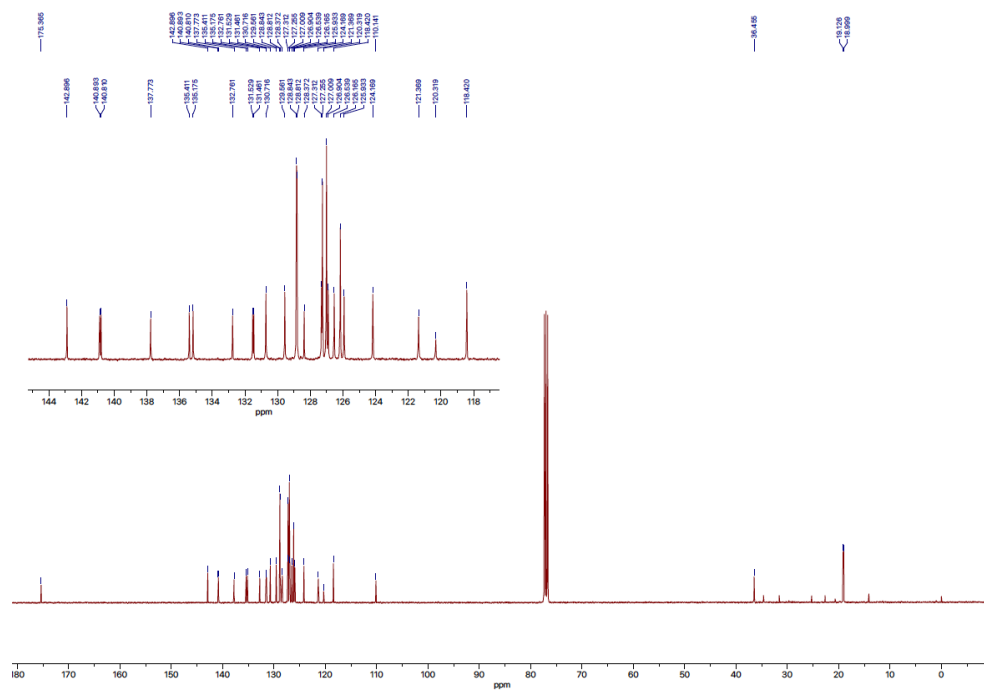



**(R)-2d**

**$^1\text{H}$  NMR (400 MHz,  $\text{CDCl}_3$ )**

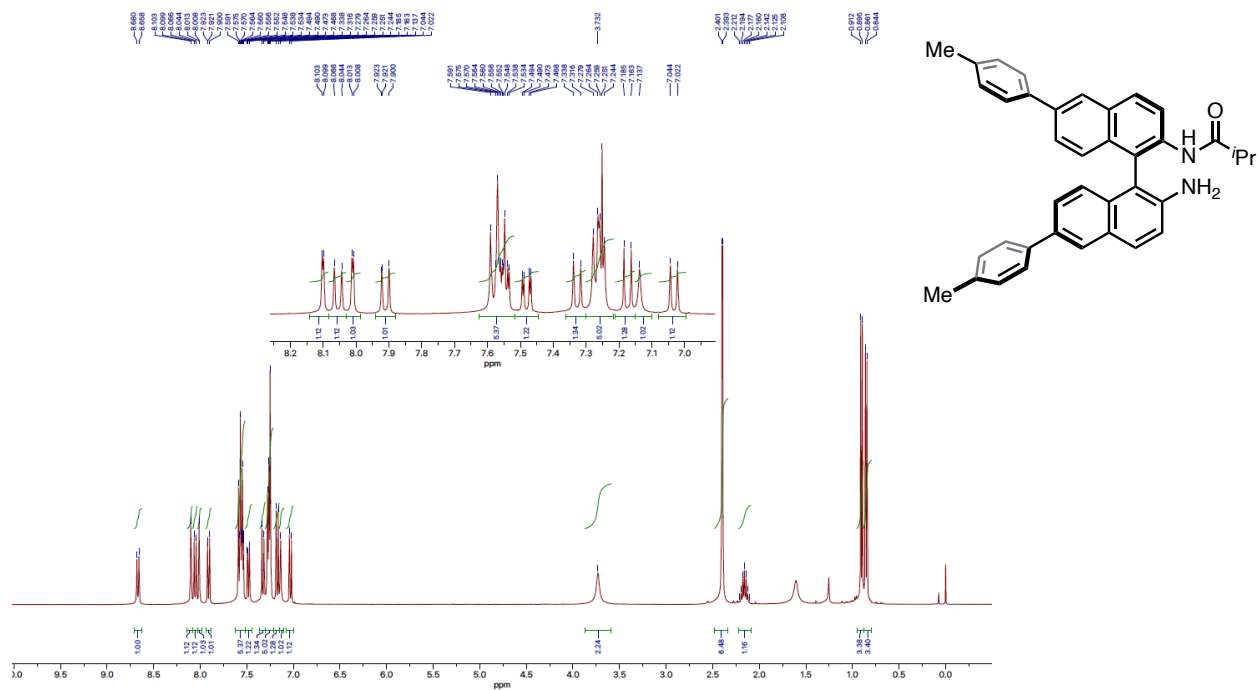

**$^{13}\text{C}$  NMR (101 MHz,  $\text{CDCl}_3$ )**

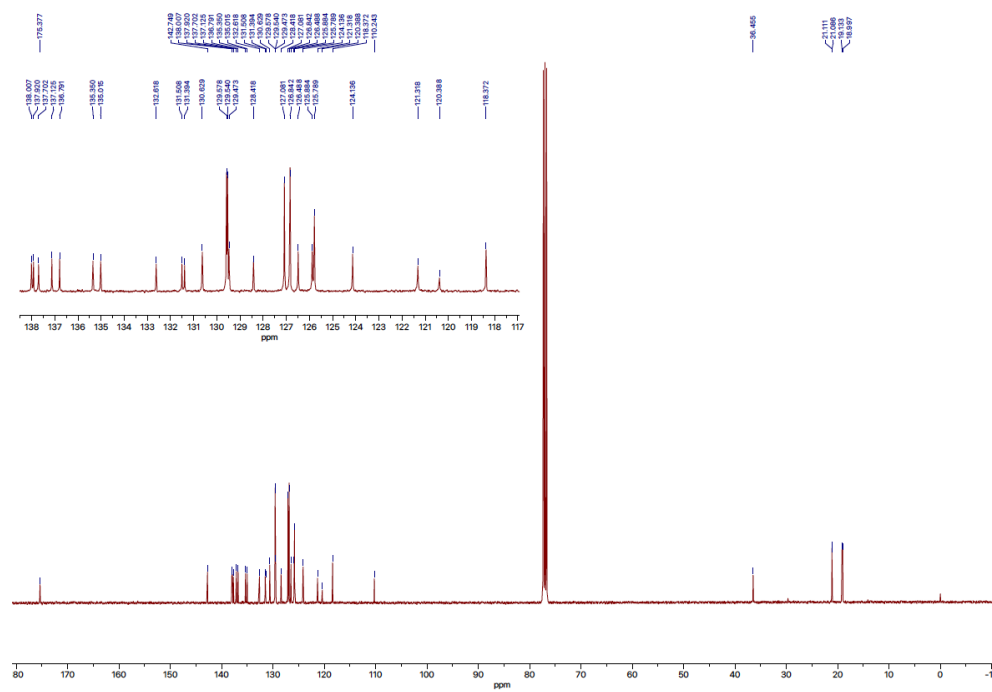

(S)-1e

<sup>1</sup>H NMR (400 MHz, CDCl<sub>3</sub>)

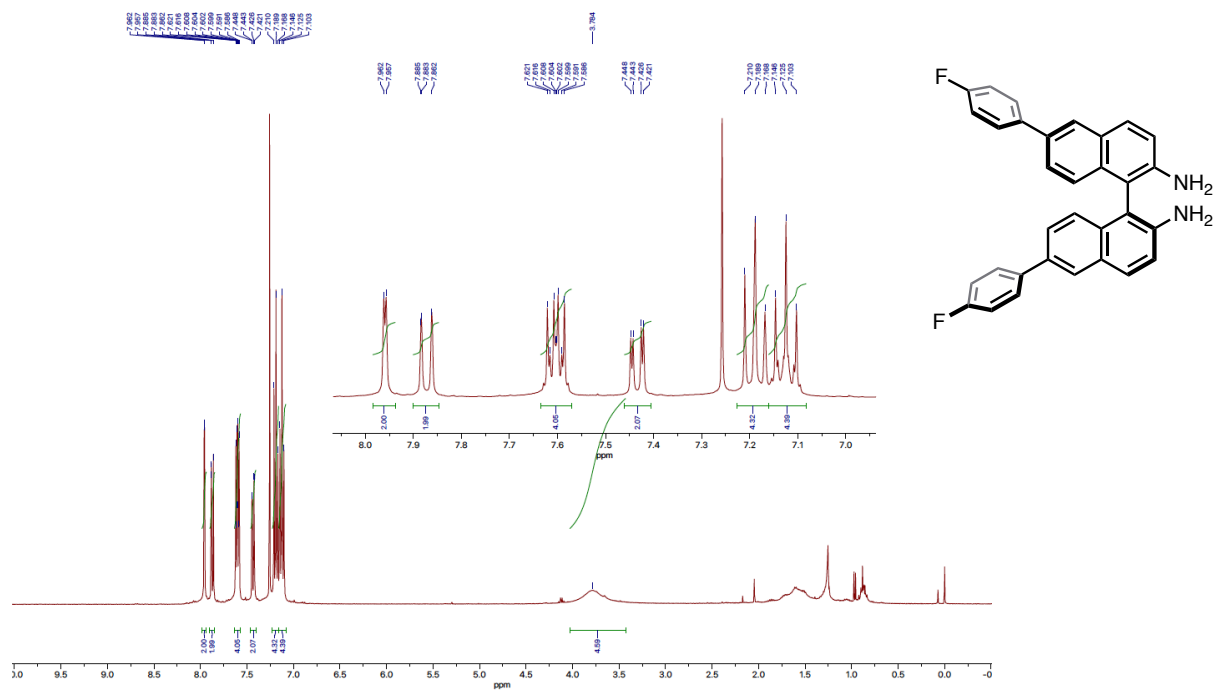

<sup>13</sup>C NMR (101 MHz, CDCl<sub>3</sub>)

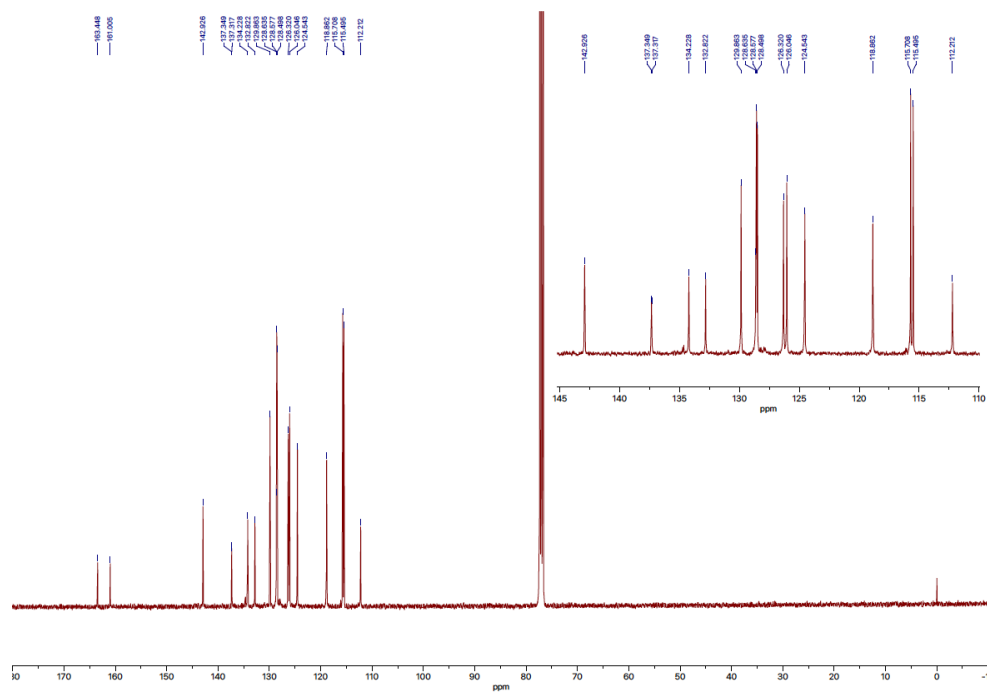



(R)-2e

$^1\text{H NMR}$  (400 MHz,  $\text{CDCl}_3$ )

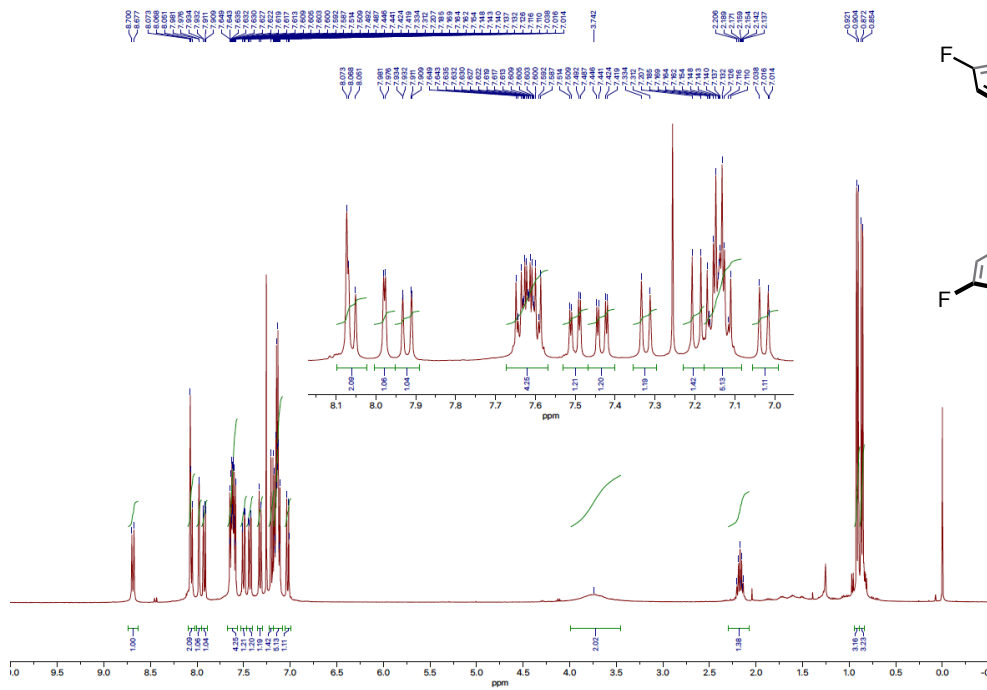

$^{13}\text{C NMR}$  (101 MHz,  $\text{CDCl}_3$ )

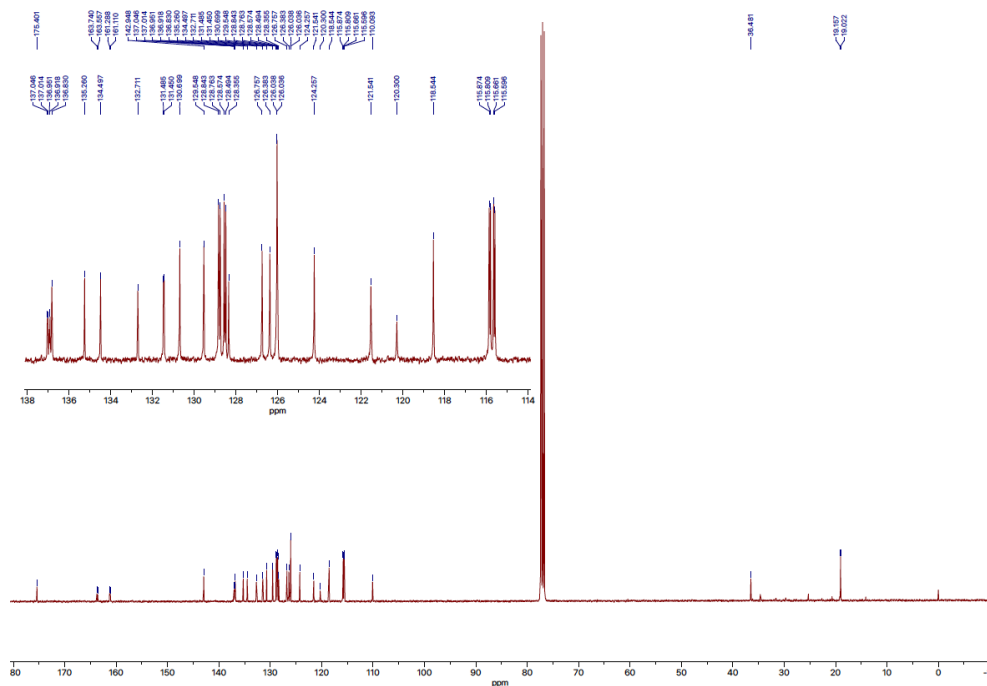

(S)-1f

$^1\text{H}$  NMR (400 MHz,  $\text{CDCl}_3$ )

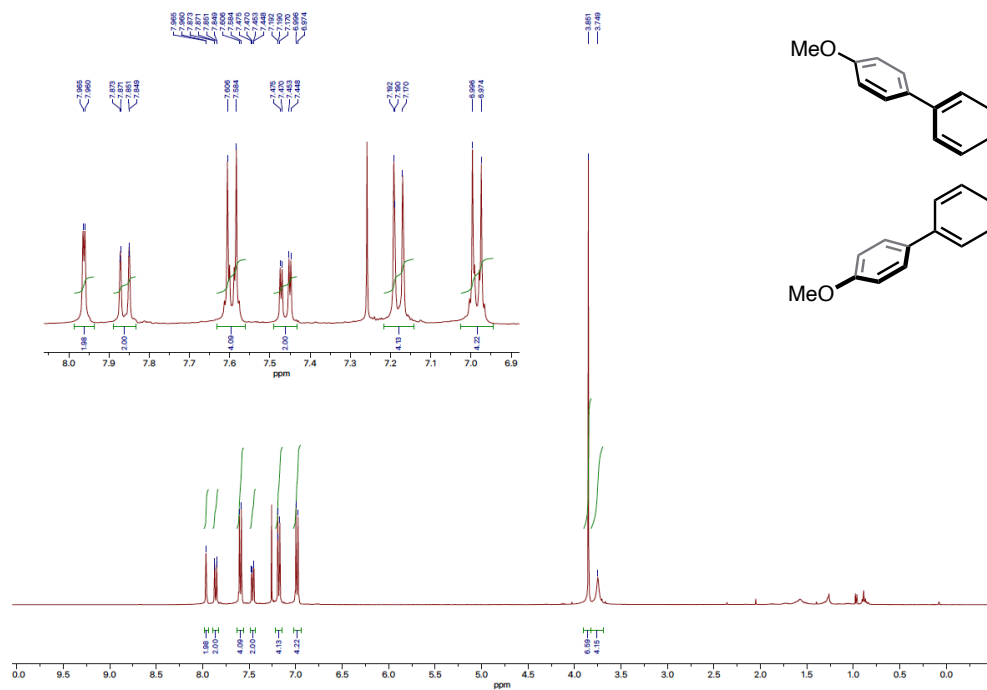

$^{13}\text{C}$  NMR (101 MHz,  $\text{CDCl}_3$ )

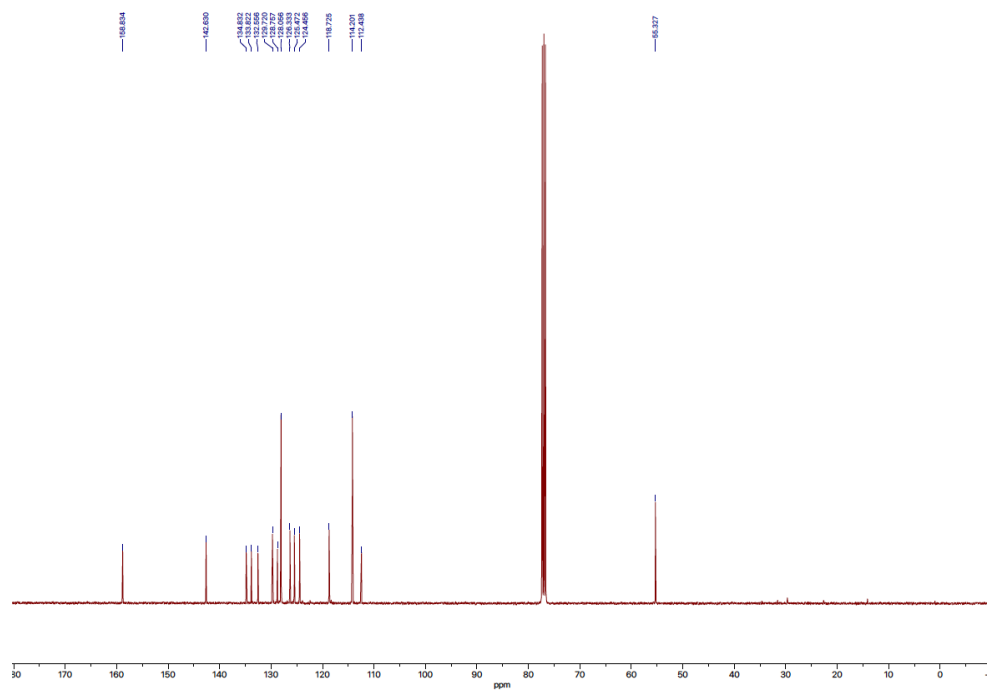

(R)-2f

<sup>1</sup>H NMR (400 MHz, CDCl<sub>3</sub>)

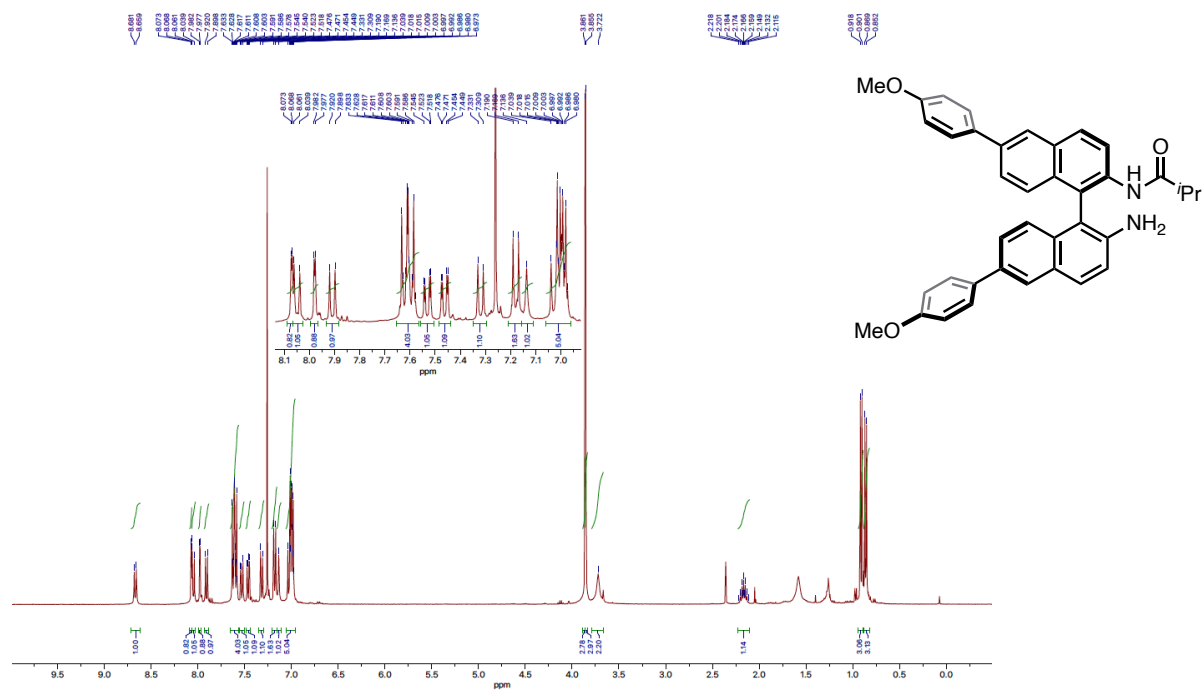

<sup>13</sup>C NMR (101 MHz, CDCl<sub>3</sub>)

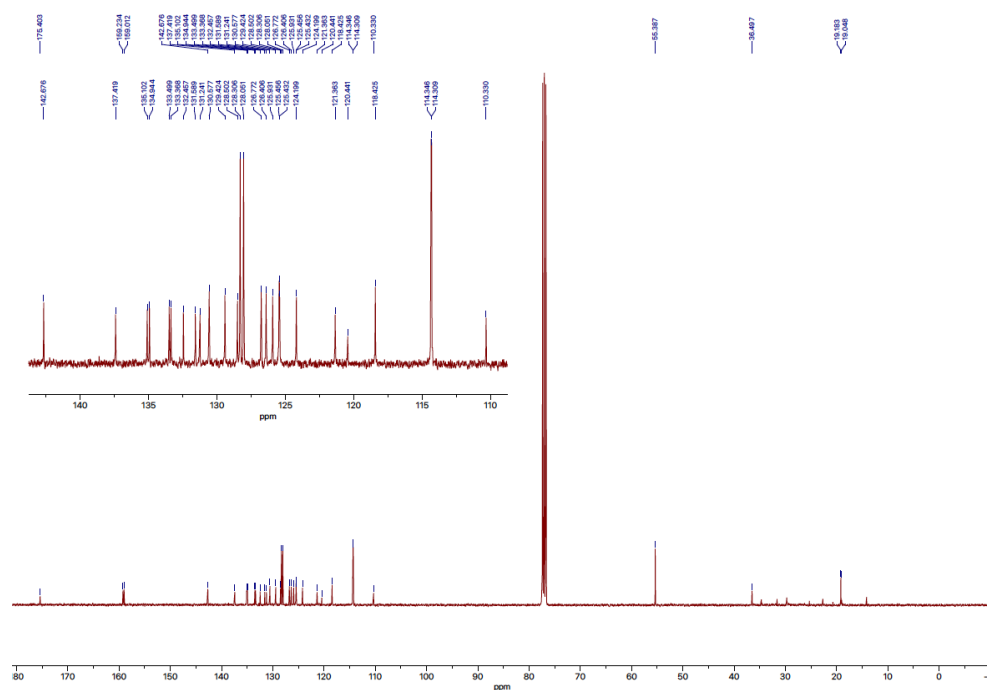

**(S)-1g**

**<sup>1</sup>H NMR (400 MHz, CDCl<sub>3</sub>)**

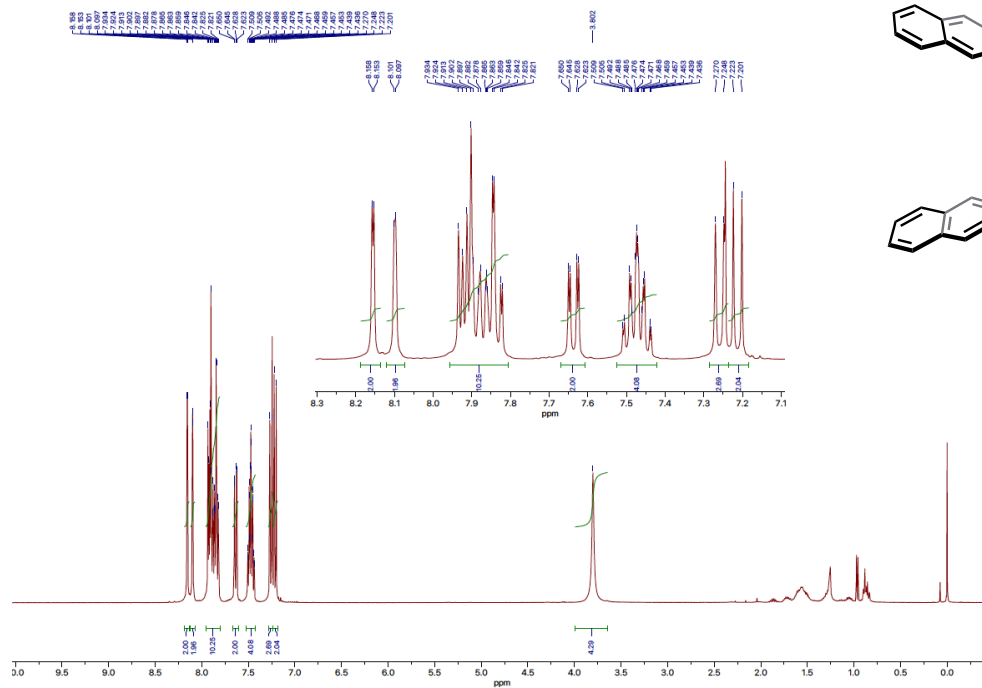

**<sup>13</sup>C NMR (101 MHz, CDCl<sub>3</sub>)**

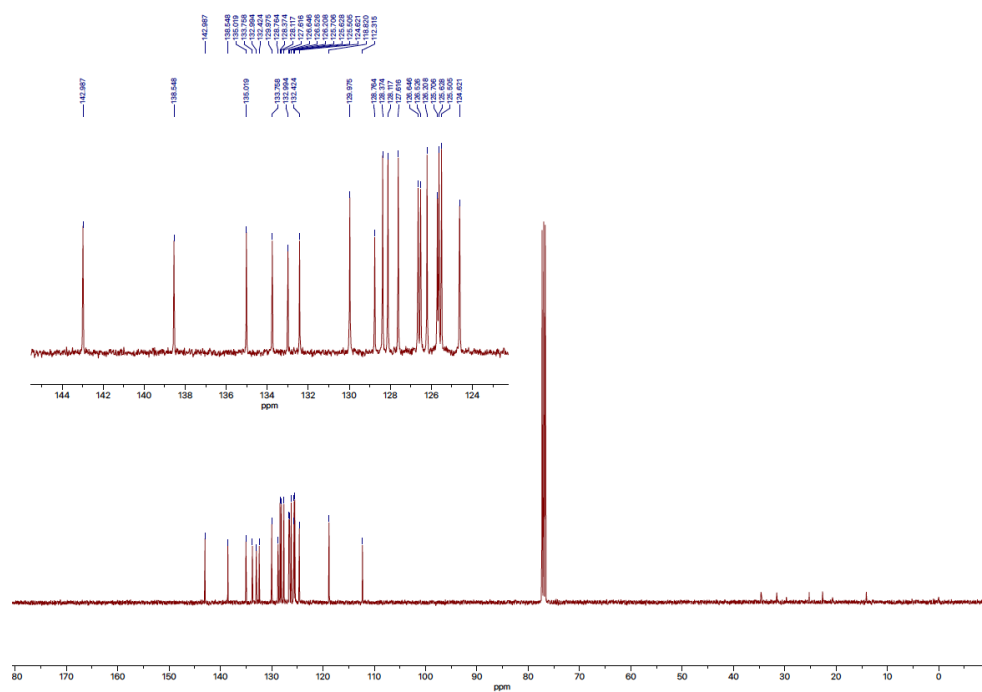

(R)-2g

<sup>1</sup>H NMR (400 MHz, CDCl<sub>3</sub>)

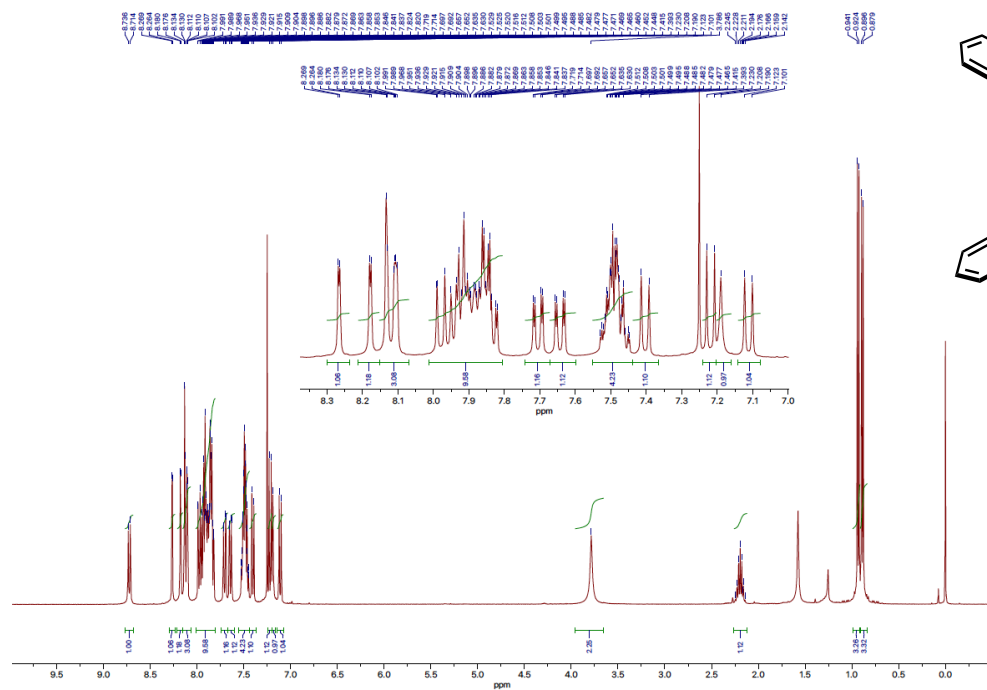

<sup>13</sup>C NMR (101 MHz, CDCl<sub>3</sub>)

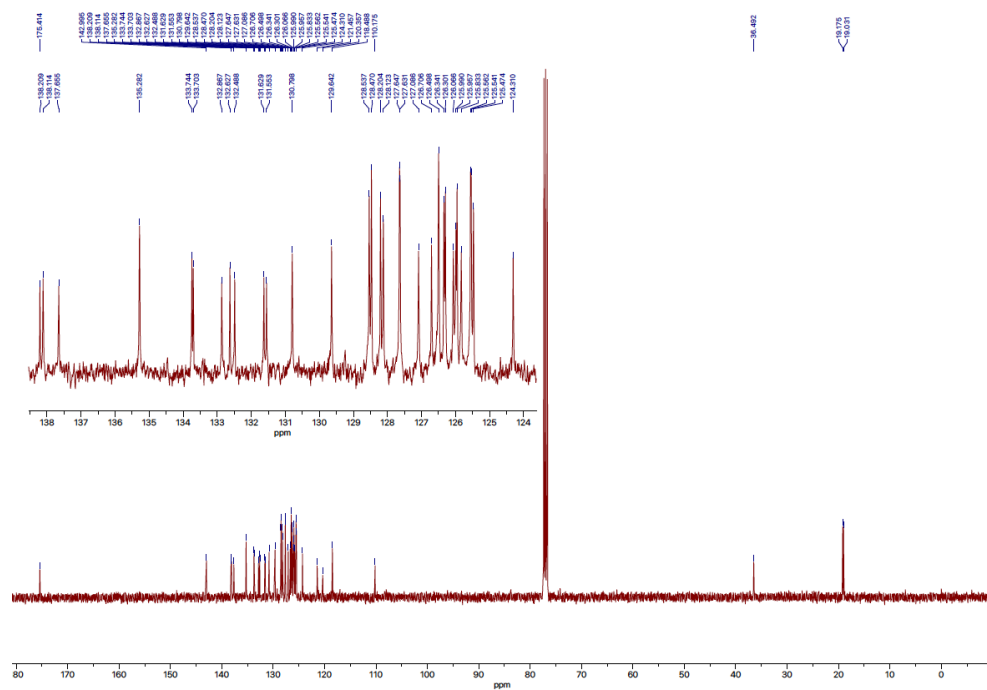

**(S)-1h**

**<sup>1</sup>H NMR (400 MHz, CDCl<sub>3</sub>)**

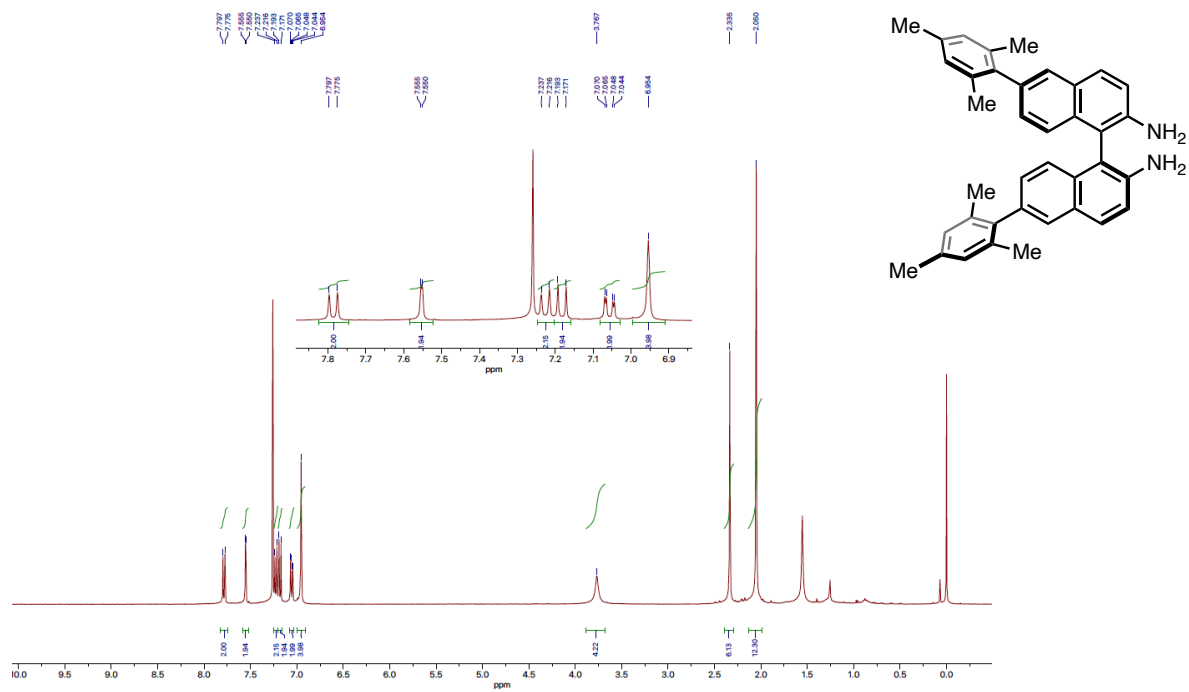

**<sup>13</sup>C NMR (101 MHz, CDCl<sub>3</sub>)**

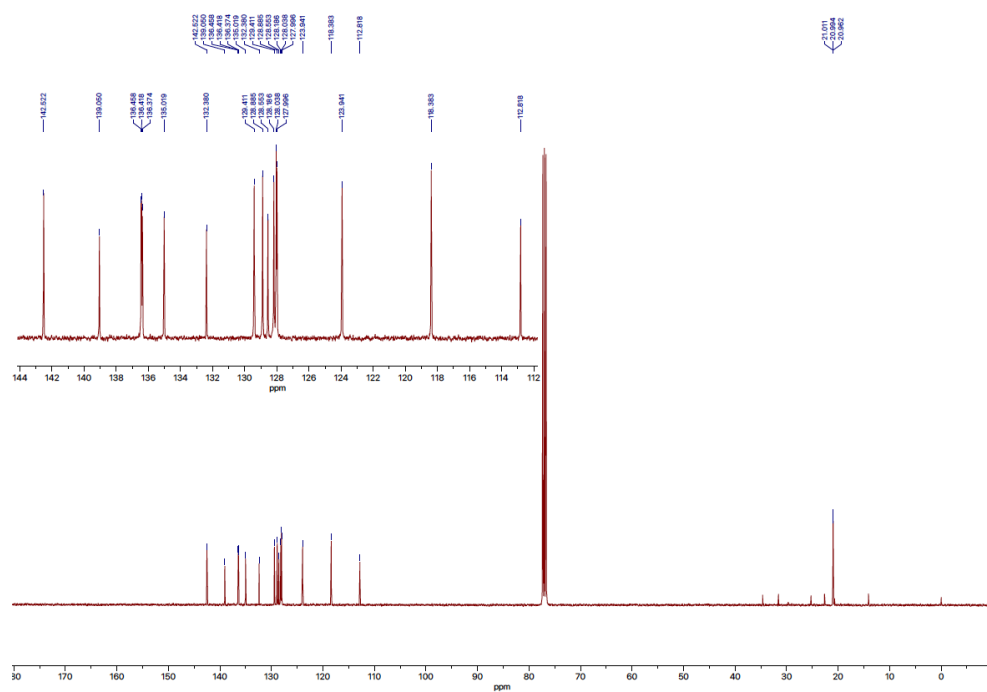

(R)-2h

<sup>1</sup>H NMR (400 MHz, CDCl<sub>3</sub>)

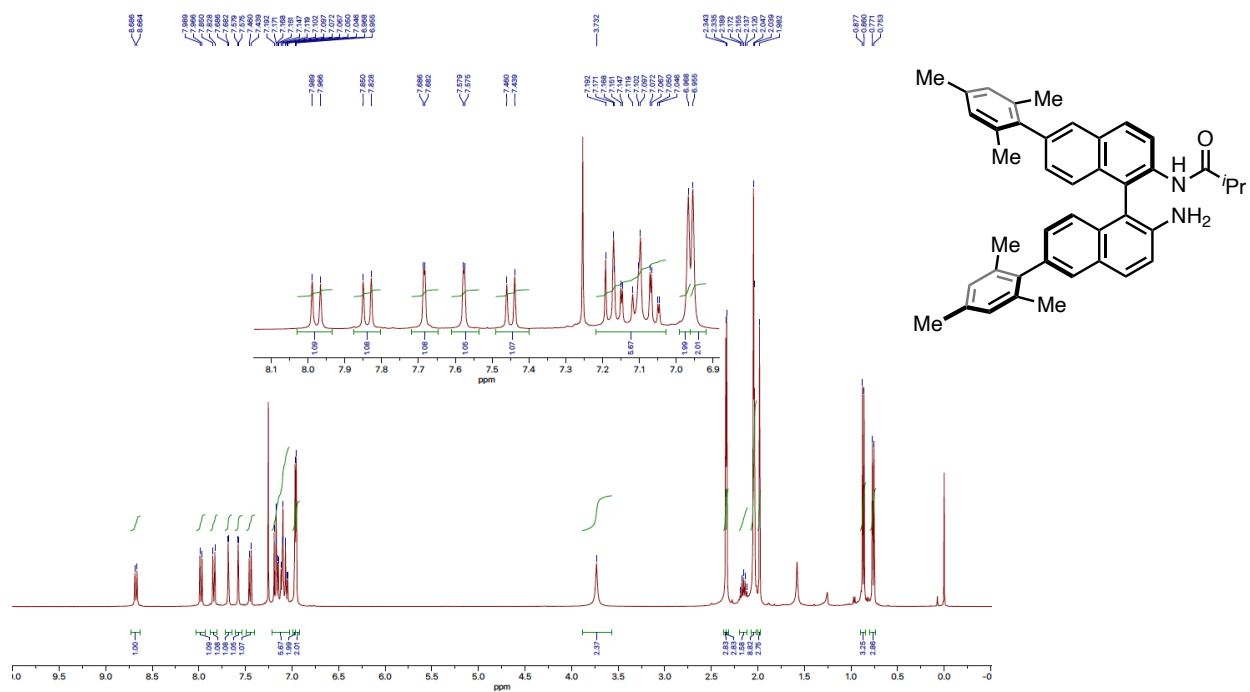

<sup>13</sup>C NMR (101 MHz, CDCl<sub>3</sub>)

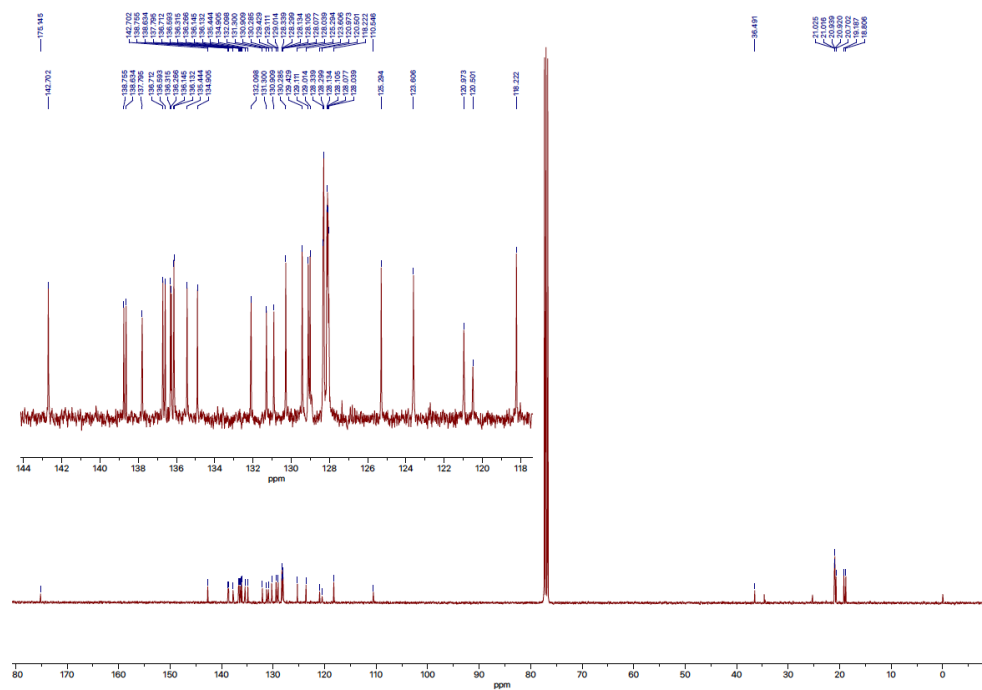

(R)-2i

$^1\text{H}$  NMR (400 MHz,  $\text{CDCl}_3$ )

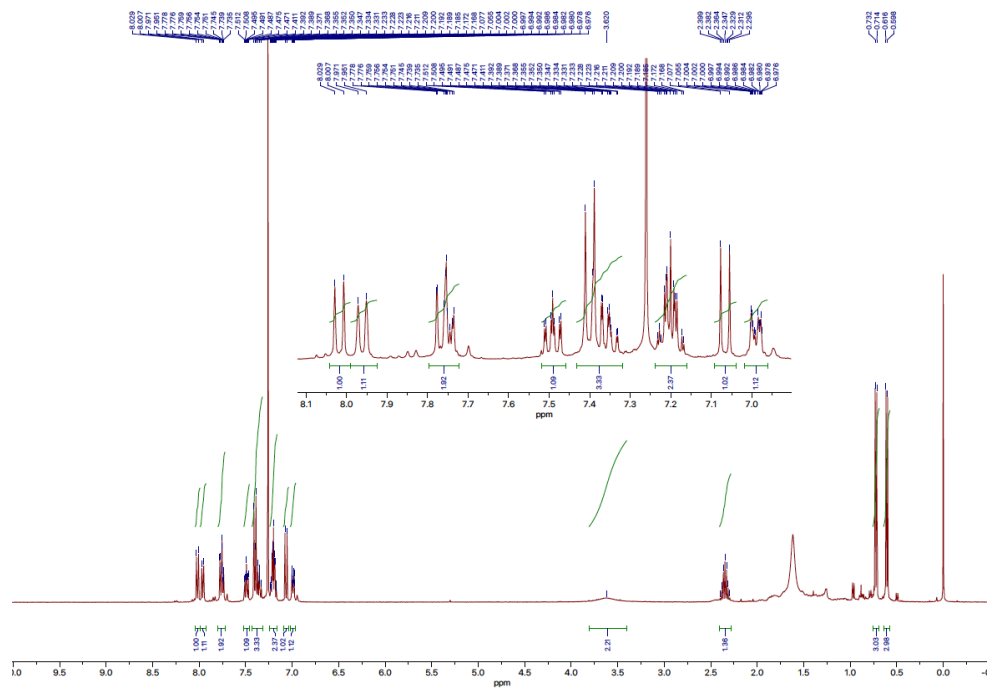

$^{13}\text{C}$  NMR (101 MHz,  $\text{CDCl}_3$ )

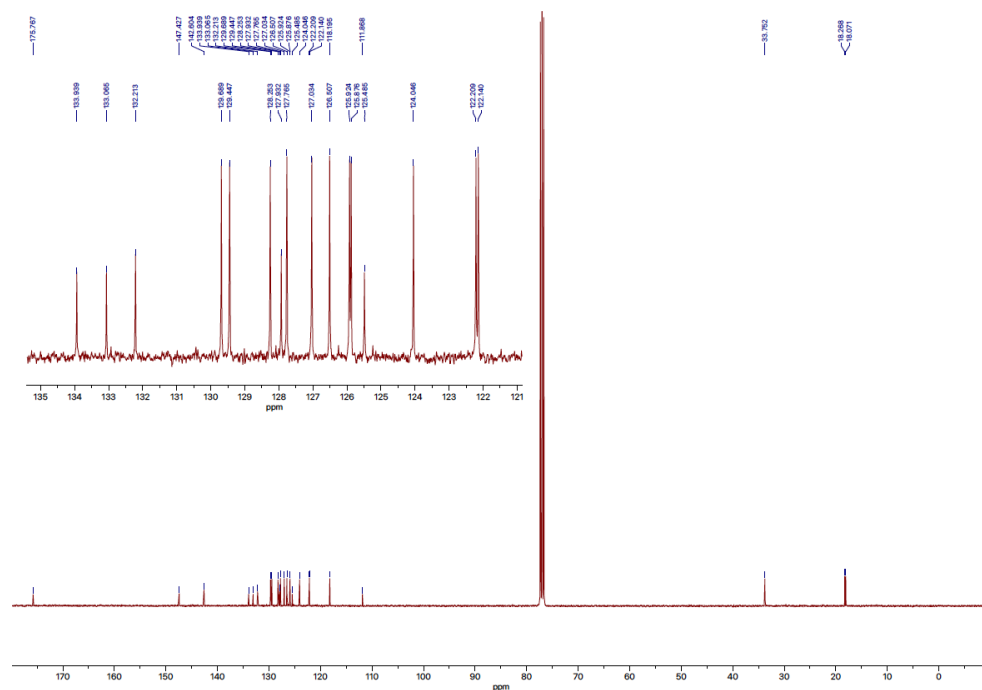

Supplement: d4ob00355a1.pdf [file d4ob00355a1.pdf]
